# Supplementary material for: Comparative analysis of structured RNAs in S. cerevisiae indicates a multitude of different functions
Source: PubMed Central journal article supplement (PMC1914338; doi:10.1186/1741-7007-5-25), 2007-06-18

1 68377\_120\_1\_-1 ... 68417\_160\_1\_1

68377\_120\_1\_-1

CATTACTGATTTGGGAAATTTCCCAAATTGGAAATATCACCTCGTCGACGTGCTGCGGTG  
CATGGCTGTTTTACCCGTTTAGGAAAAAACTCGGCGGGTTTTCTTGACGGGCAAATGTCG

68417\_160\_1\_1

AAACGGGTAAAACAGCCATGCACCGCAGCACGTGACGAGGTGATATTTCCAATTTGGGA  
AATTTCCAAATCAGTAATGTAGCCTCTACGGGTGTCTCTGTCAGCCCCGTGGTCGCCAG  
CACAGAATGTATCGTACCCCTGAAGGTAGTTTTTTACCGC

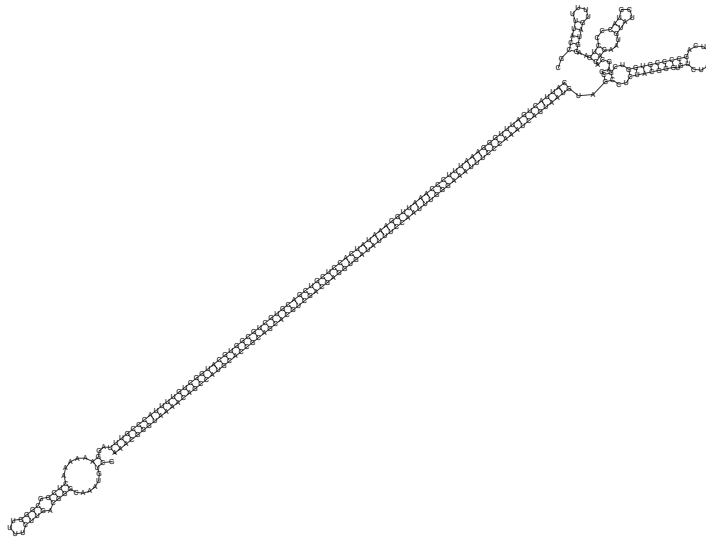

2 176465\_196\_1\_-1 ... 176465\_196\_1\_-1

176465\_196\_1\_-1

CAAAC TAGAGTCCCTGCTTTACGAATGAAACCTGTACAGGTATGAGAGGTTACGAAAAAA  
AATGATAAATGAAAAAAAAAAGCTTAATAATATGAAATTAATAGTATGAATAGTTAGGC  
GCATGTATATAAATATAAATTTTTGTATATATGTATTATTAATATTATAAATTTCTTATT  
ATTAAACCATCCTTTA

176465\_196\_1\_-1

CAAAC TAGAGTCCCTGCTTTACGAATGAAACCTGTACAGGTATGAGAGGTTACGAAAAAA  
AATGATAAATGAAAAAAAAAAGCTTAATAATATGAAATTAATAGTATGAATAGTTAGGC  
GCATGTATATAAATATAAATTTTTGTATATATGTATTATTAATATTATAAATTTCTTATT  
ATTAAACCATCCTTTA

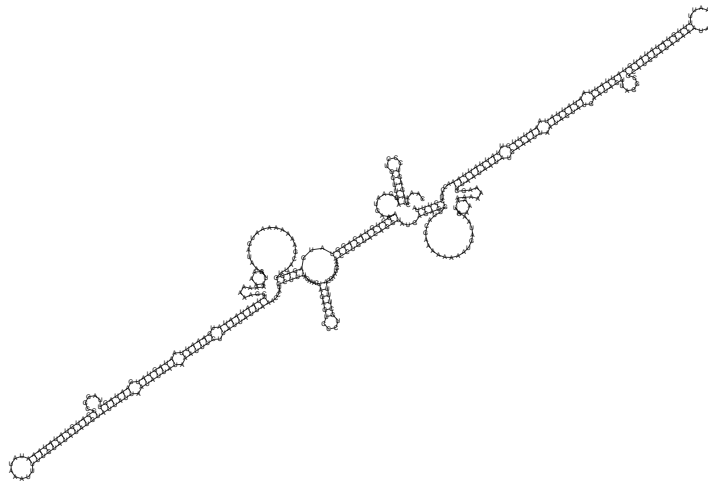

3 177376\_120\_1\_-1 ... 177336\_121\_1\_1

177376\_120\_1\_-1

TTAATTTTTCATTGTTTCTAATTTGGGAAAAGTCCGATTTCCCTCCTACTAACCGTTTAG  
TGCCAAGGGTGAGATGGCCCTTGAACGAGGGCCAAAATAAATTTGGCTTTGGTTCTATT

177336\_121\_1\_1

AAAAGTGCCTATAGGGCTGCAGCTGCAGTTTTGGCCAAGAAATAGAACCAAAGCCAAATT  
TATTTGGGCCCTCGTTCAAGGGCCATCTCACCTTGGCACTAAACGGTTAGTAGGAGGG  
A

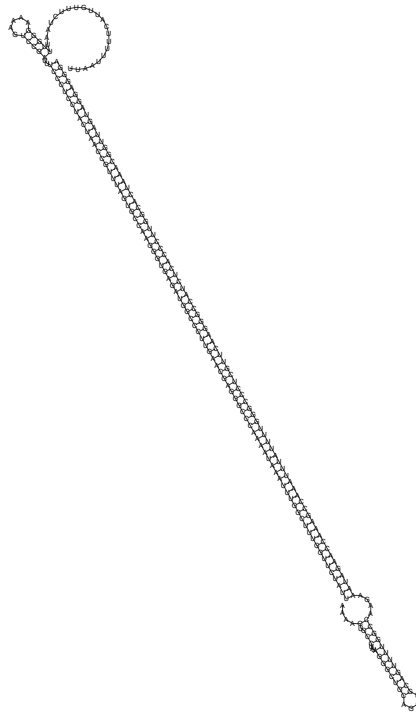

4 144137\_119\_11\_-1 ... 144176\_119\_11\_1

144137\_119\_11\_-1

CTTGATTTGGCGCATGTTGTAATGAATGGAGTAGGGATAATCCTGGAGATGCATGATTTA  
TCCCTTCTATTTCAAGTCGACGGCGAAATATGCCAAATTTAGAAAGCCCTCGGCCTTGA

144176\_119\_11\_1

GTCGACTGAAATAGAAGGGATAAATCATGCATCTCCAGGATTATCCCTACTCCATTCATT  
ACAACATGCGCCAAATCAAGCCTATATAAGATTCTCGTCATTTAGCATGCTCTATTGAT

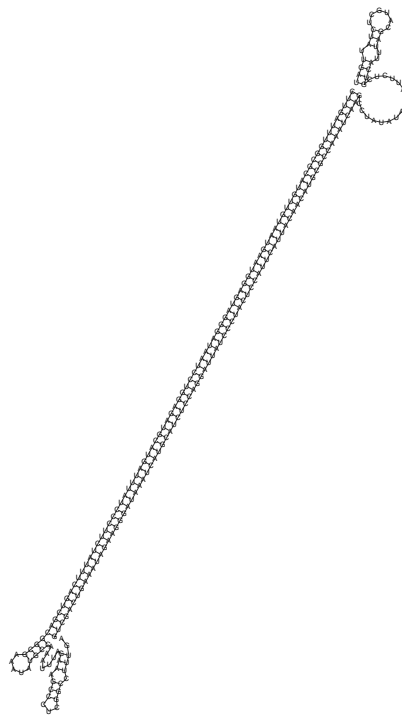

5 289857\_120\_12\_-1 ... 289817\_120\_12\_1

289857\_120\_12\_-1

TGCACAGTTAACTTTCTAGCAGGAGTATAATGCCATTTGCTCCCCATCTTGAGATGGGAA  
GGGCTTAACTAATCTCGGTTTCGGAGTGATCCGCCCGATACTGCCTTCTGCCTTAATATC

289817\_120\_12\_1

GGAGATATCTGCGCCGTTTCAGGGTCCATGTGCCTTGGACGATATTAAGGCAGAAGGCAG  
TATCGGGGCGGATCACTCCGAACCGAGATTAGTTAAGCCCTTCCCATCTCAAGATGGGA

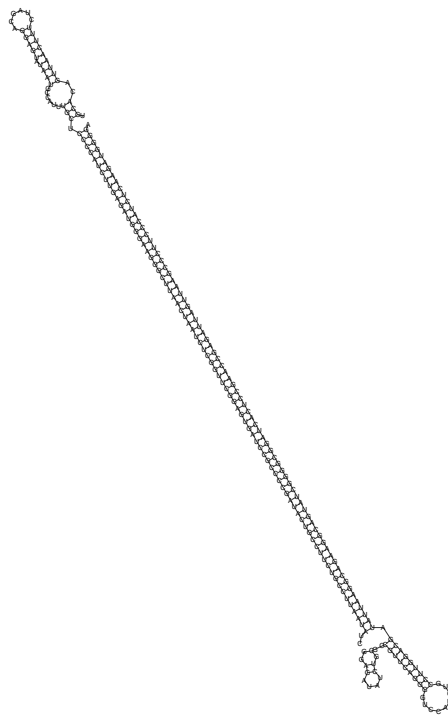

6 534534\_117\_12\_-1 ... 534573\_158\_12\_1

534534\_117\_12\_-1

GGACAAAATTAACCCTGCTTACACCAGGGTTTATCTAGAAATAAAATAGGTCATTGTTTT  
GAGATGACTTGGA AAAACTTAACCCTGATGTGACTGTAACATAACATCTAAGAAAAA

534573\_158\_12\_1

GTTTTCCAAGTCATCTCAAAACAATGACCTATTTTATTCTAGATAAACCCCTGGTGTA  
GCAGGGTTAATTTGTCCCAAACGGGCAAAATATAAATACCCCTTCGGGAAATAAACTA  
AAAAGAGTTCTAATTAGCCAATTGGCAAGAAAGCTCGA

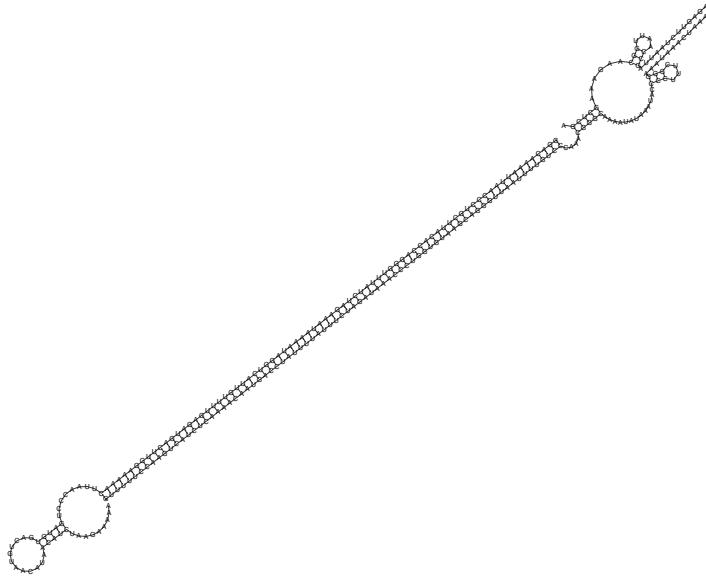

7 602654\_123\_12\_-1 ... 602614\_121\_12\_1

602654\_123\_12\_-1

GTAATCATTTCGTTCTTCGACTTTTATAGCCTTTTTTTTAACTTAACGAACTCGTACTATC  
TAATAGTTTATTCCCTTGTTTTTTTTTGTACGATTGGGGAAAAGCAAGGGTCCCTG  
CGT

602614\_121\_12\_1

ATCGATTTTCGGTGACTAGTTAGTAGATGATGTAATCGTAGACGCAGGGAACCCTTGCTTT  
TCCCAATCGTAACAAAAAACAAGGGAAATAAACTATTAGATAGTACGAGTTCGTT  
A

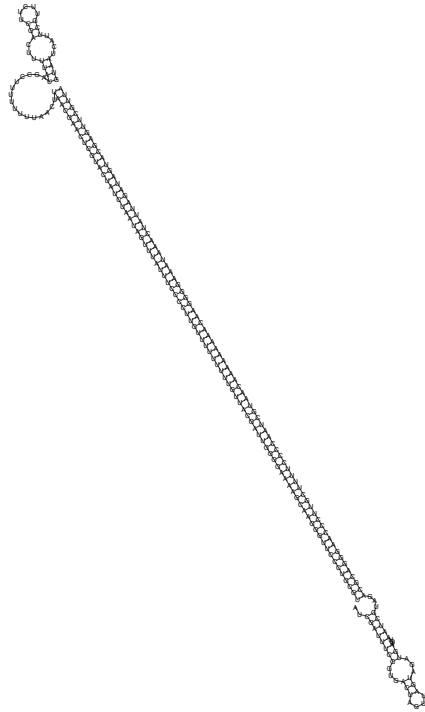

8 789942\_120\_12\_-1...789982\_162\_12\_1

789942\_120\_12\_-1

CTCAGCCTCGAGAAACATTCCGCGGCATTTCCGTGAGATCTCTCAATTAATTTCTTTT  
TTTAGATTTTTTCCGTTTTCCGTTTGAATAATTTCCGTTTTTCGTAGAGCGCGACGGCC

789982\_162\_12\_1

AAAACGGAAAAAATCTAAAAAAGAAATTAATTGAGAGATCTCACGAAATGCCGCGAG  
GAATGTTTCTCGAGGCTGAGCGCGTGGTCTGTGCAAAAAAATGGCAATTTTTTTGTAGG  
AGTTTGCATTGGGCCATTCAGAAGGAGCACCGTTAGATGGGA

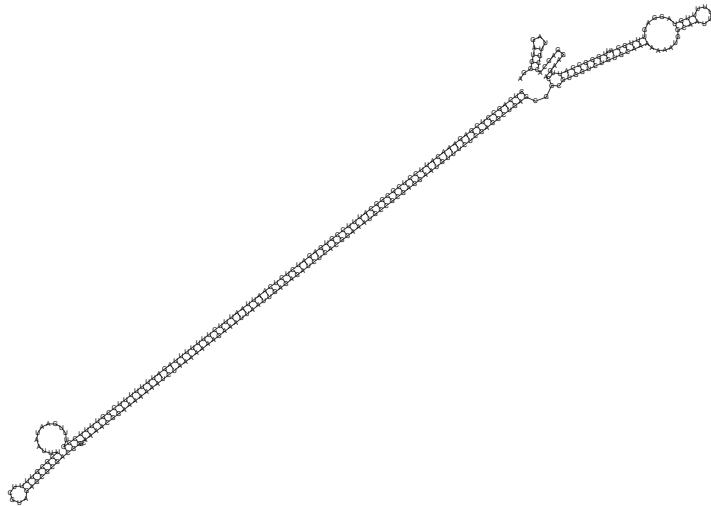



9 481901\_121\_13\_-1 ... 481942\_123\_13\_1

481901\_121\_13\_-1

AAGACTCCTTATATATGACAGTTTGCTGTATTTGTACAGTTGGACCGTCTTCATTACAAC  
AATATTTATTGAACAGTAGCTTGTAAATAGGCCGGCATTTTTTTGGTTAATAACAATGCCA  
G

481942\_123\_13\_1

GCTACTGTTCAATAAATATTGTTGTAATGAAGACGGTCCAACGTACAAATACAGCAAAC  
TGTCATATATAAGGAGTCTTATGTGACAGCACTTGCGTTATTGTCAGCCGGAGTATGTCT  
TTG

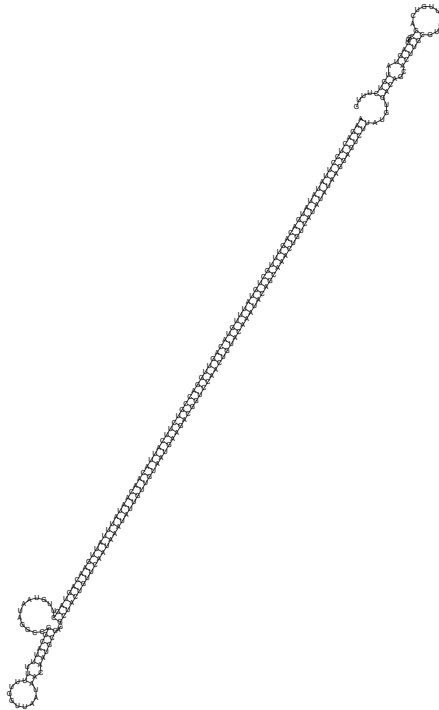

10 861691\_124\_13\_-1 ... 861651\_124\_13\_1

861691\_124\_13\_-1

TTATTTGGAGCTTTTTTGCTGGCATTCTTATCTCGTGCTTTTATTAGTGGGCCCTTCT  
TTGAGACCCCGGGGTGATATGGCCCTGTCTCAATGATGGATAAAGTTGTTGGAAGCAA  
TTAC

861651\_124\_13\_1

CAGTACACTTCGGTAGCAACCTTCGTTTGTGATTGTCTTGTAATTGCTTCCAACAATT  
TATCCATCATTGAGACAGGGCCATATCACCCGCGGGTCTCAAAGAAGGGCCCACTAA  
TAAA

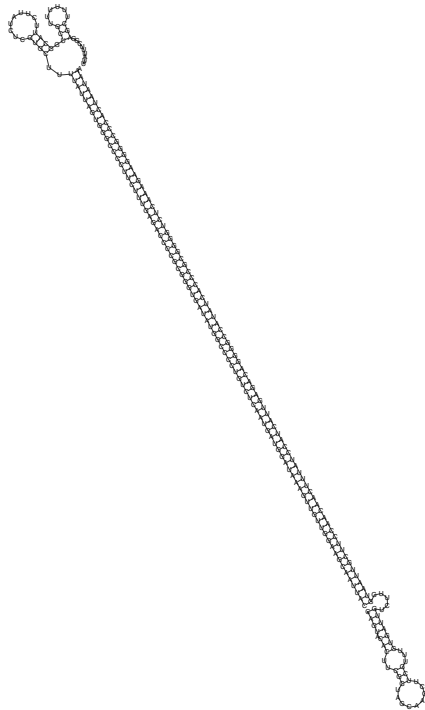

11 87516\_120\_14\_-1...87556\_120\_14\_1

87516\_120\_14\_-1

TTCGAGTCGCTTTTTCGTCGCATGCCTCCGCGAAAAATTTTCGCGCCGGACGCGATTTTAA  
ACACGAAATTCTTGTTCGTGCCGCTGTTGCCCTTTTGGGAAATATTTCCCGATCTGGCAT

87556\_120\_14\_1

CACGAACAAGAATTTTCGTGTTAAAAATCGCGTCCGGCGCGAAATTTTTCGCGGAGGCATG  
CGACGAAAAGCGACTCGAAATGTCGGGAGCCAAATGAGGCTACAAGGCTGTGGGCAGAT

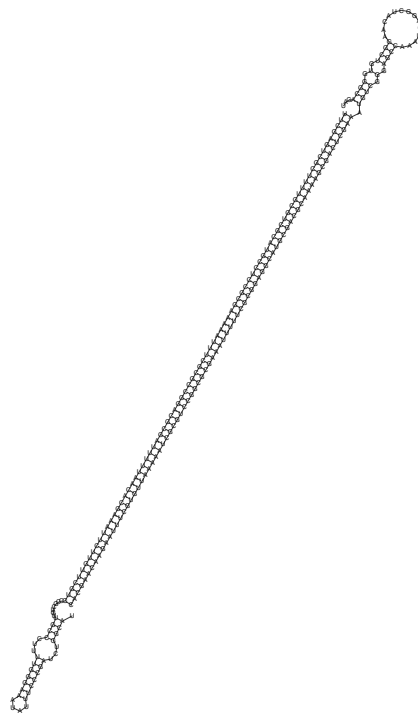

12 405735\_125\_14\_-1 ... 405776\_124\_14\_1

405735\_125\_14\_-1

GGAAGCTATGATATGGGGATTCCATTGAGCCGATAGCAATGTAGGGTAATACTGTTGCG  
TATATAGTGATAGTTATTGAATTTTATTACCCTGCGGGAATATTGAGACATCACTAAGCA  
CGAAT

405776\_124\_14\_1

AAATCAATAACTATCACTATATACGCAACAGTATTACCCTACATTGCTATCGGCTCAAT  
GGAAATCCCATATCATAGCTTCCATTGGCCGATGAAGTTAGTCGACGGATAGAAGCGG  
TTGT

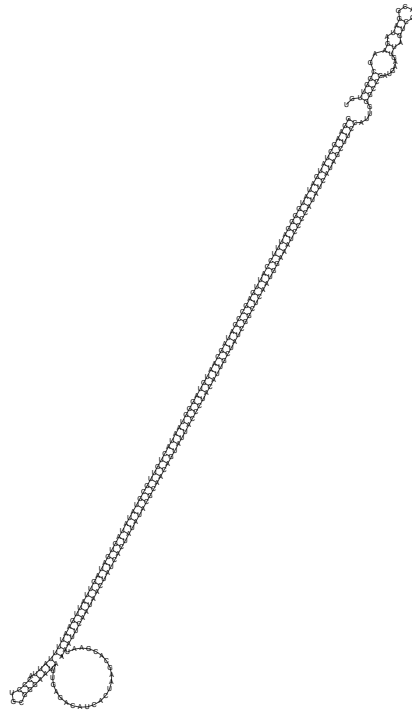

13 1004686\_117\_15\_-1 ... 1004646\_121\_15\_1

1004686\_117\_15\_-1

AGAAAATAAAAAAATTAAAACTCAAAATAAAATGTATTCCAATGTAAAGGAAAAAATAA  
AATAATAAGGAAAAAAGAACTATTATTTAAAGCCTTCAATAATGGAATGCTGAAA

1004646\_121\_15\_1

TTGACTATTTGACTCAAATTACCAAAATCATAACTTTTCTTTTCAGCATTCCATTATTGA  
AGGCTTTAAATAATAGTTTCTTTTTCCTTATTATTTATTTTTTCCTTTACATTGGAA  
T

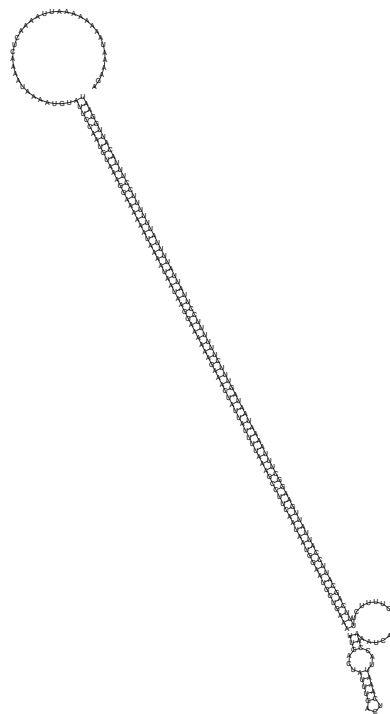

14 1057918\_121\_15\_-1 ... 1057877\_121\_15\_1

1057918\_121\_15\_-1

AATAGAATAGCGTGTAGTTGTTAAAATTTTATTTCACTGAGGCTTATATGCTTACTGAGA  
AATTTTTTTTTTTTACAAAAAATTCTTTTTATGTTATACCAGCTGTGGATTACCACAAC  
A

1057877\_121\_15\_1

AATTAAGTGAATTTTTTTCTGGATTGATGTTCTTTCCAATTGTTGTGGTAATCCACAGC  
TGGTATAACATAAAAAAGAAGTTTTTGTAAAAAATAATTTCTCAGTAAGCATATAAG  
C

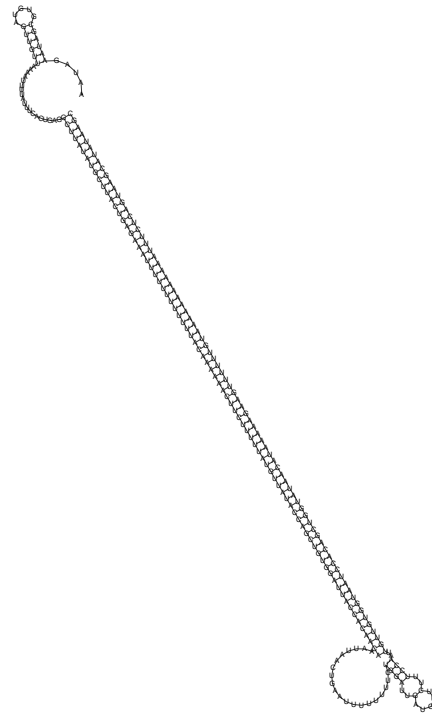

15 425979\_122\_16\_-1 ... 425897\_158\_16\_1

425979\_122\_16\_-1

TCTTTCTGTCAAACCTAGCGCGCTTTTGGCAATCTCCATTTTCCTCTTTTTTTTTCCGTT  
TTTGTATACTAAACAACCTTCGGGGCGCGTTATAGATAGAACGACTTATACACATCTATT  
TT

425897\_158\_16\_1

ATGCTGGCGTCCTTAGCCTCACGCCTACTAAACAAGAGCATCTTACTCTCACCATCCATT  
TATATACATATATAAGTACGTAAAAATAGATGTGTATAAGTCGTTCTATCTATAACGCGC  
CCCGAAGTTGTTTAGTATAACAAAAACGGAAAAAAAAA

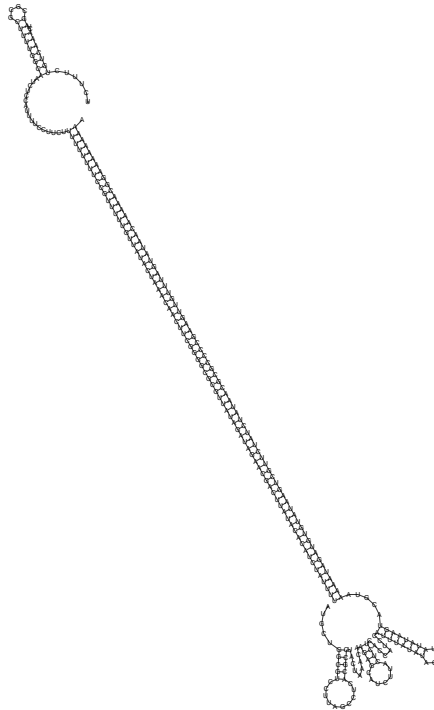

16 812791\_123\_16\_-1 ... 812831\_165\_16\_1

812791\_123\_16\_-1

AGCTGGTTTGCCCGGATAAGGCGGGCGAGTTATTTTGAAGTTTTCCATAAACTGGTTTT  
CCATCTCGAGTTTTTCTCGCTTCCACGCTATGACCCTTTTAGTTAAGGTACCCGAT  
GGC

812831\_165\_16\_1

AGCGAGGAAAAACCTCGAGATGAAAAACAGTTTATGGAAAACCTCAAATAACTCGCCC  
GCCTTATCGCGGGCAAACCAGCTACGAGAGATAAGGATTTGGCGCCGAGATAAGGTGGAG  
ATGTTTCTCCGCCGCGGCACTTTTCCGGAACCTGGAACCTGGT

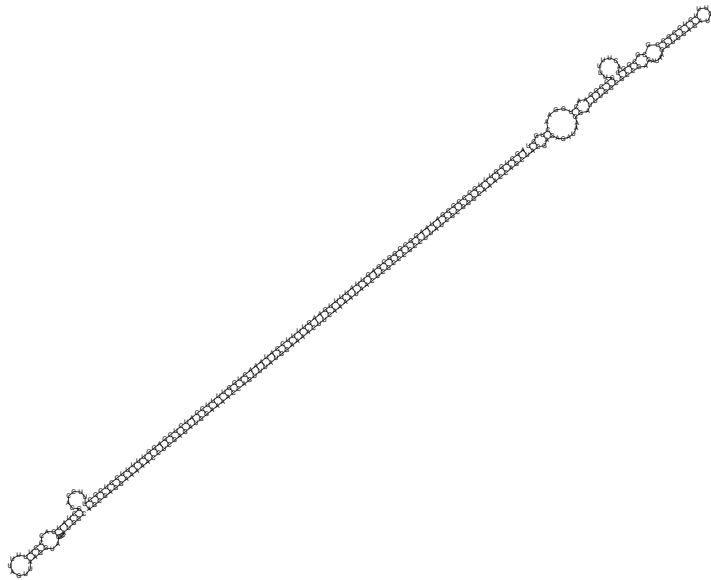



17 830482\_202\_16\_-1 ... 830605\_137\_16\_1

830482\_202\_16\_-1

TAGAAATAAGACTTCTTCATAATCGTTAATGAAGAAGTGCATATGATTTGTTATTTTTT  
TCTGGTATTTTTTTCATTTTTTTCGGGTTTTCTTGGGTATAATTTTTGTTCTTCCGA  
AAGACGGAAAGGGATGAGGGAAAAACGGAGTTTTCTTATTGCTTCTTTTTCCCTAATT  
TATTCACGGTGTCCATTTATTA

830605\_137\_16\_1

AAATGAAAAAATACCAGAAAAAATAACAAATCATATGCACTTCTTCATTAACGATTA  
TGAAGAAGTCTTATTTCTAACTAATATTATTATTATTATTATTATTATCATTACCC  
CGCTTCTTTTATTATA

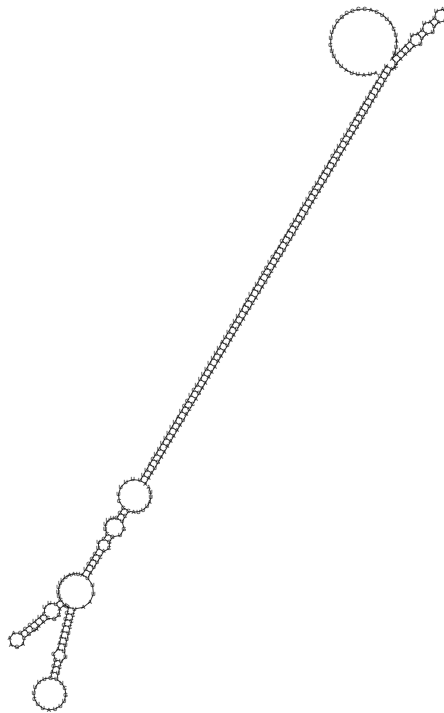

18 1370\_244\_4\_-1 ... 1269\_305\_4\_1

1370\_244\_4\_-1

AAGGGTATCCATTTTCATTTCTGTTTTCTATCTAGCCAATTCAATAATCGTAATAACGAA  
TTTACAAAACCTTAAATGCGGGTACATCACGGTGTGCCGTAACGTTGGTTTACATTTAAGG  
TGGGACCAGCAATGTCACTGCTCGTACAGCGGTTACCGCTTGAATGAAATACATATTTTA  
AGCGTAGATTTCTGTGACAAAACGTGTAAACATCTAGTAGAAAAATAGACGTAGCTGTC  
ACAA

1269\_305\_4\_1

CTATTGACATGGTATCGAAAGGTTGTCCACATTGGGAAGTAACTTGGTTCTATGAATCTT  
CATGTCAGATACGTAGGACAGACTCTTTCCTGTGTAATATTTGTGACAGCTACGTCTAT  
TTTCTACTAGATGTTTACACAGTTTTGTACAGGAAATCTACGCTTAAAATATGTATTTT  
ATTCAAGCGGTAACCGCTGTACGAGCAGTGACATTGCTGGTCGCACCTTAAATGTAAACC  
AACGTTACGGCACACCGTGATGTACCCGCATTAAGTTTTGTAATTCGTTATTACGATT  
ATTGA

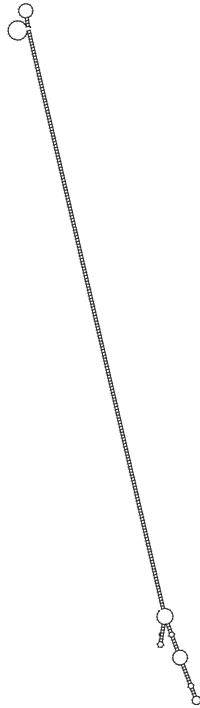

19 60648\_126\_4\_-1 ... 60609\_124\_4\_1

60648\_126\_4\_-1

GTGACATGGTATAATCCATATGTATCGTGCTGAAATTTTTCTTGGAGATTTTCATTTAT  
TCTCCACCATTCTTTCTCGCCTCCCCTCCTCTTTTCTTCTAATAATAACTTAGTTCTT  
TTTCCT

60609\_124\_4\_1

TTATTGACGTTTTTTTTTTCTTAGTCTCTTAATGAAGAAGGAAAAAGAACTAAGTTATT  
ATTAGAAGGAAAAGGAGGAGGGAGGCCGAGAAAGAATGGTGGAGAATAAATGAAAATCTC  
CAAG

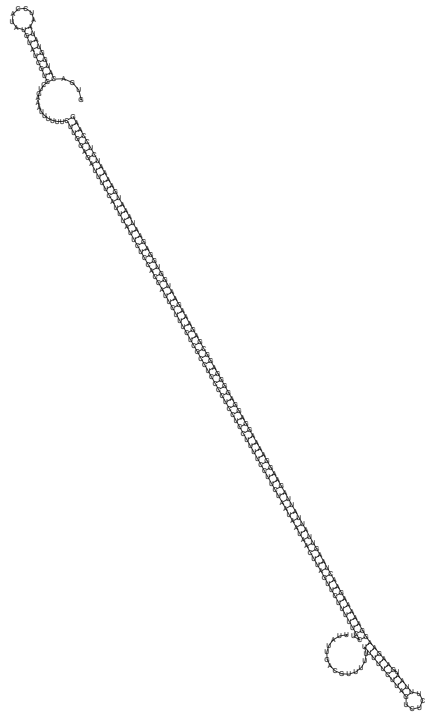

20 1330771\_121\_4\_-1 ... 1330725\_124\_4\_1

1330771\_121\_4\_-1

GATATTGTATATATTCAATTGCACCTCTTAACTGGTACTTTATTTCTTGTGAATGTTTCTGA  
TATCTTACCGCTTATTCTCTCATTCCATATGAGAACTCTCGTATAGAAAGGGAGACCTTT  
T

1330725\_124\_4\_1

CCAAGCCGATCTATTTTGGATATCTTATTGTCATTTTCAAGTGAAAAAAGGTCTCCCTT  
TCTATACGAGAGTTCTCATATGGAATGAGAGAATAAGCGGTAAGATATCGAACATTCACA  
AGAA

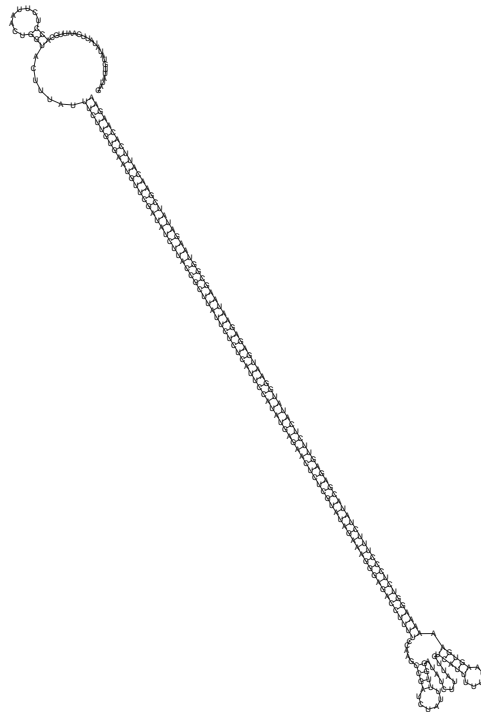

21 1516529\_286\_4\_-1 ... 1516735\_200\_4\_1

1516529\_286\_4\_-1

TTTAAGCACAAGATATAGACGATACCATACATGAATGTCGATCAGAGACGTATGGTATAG  
CTTGTGTCACATTCTGCTATCGTATATGGTATACATGGCACATACTTTAAATTTTAAAGT  
AATGTCAC TTGATTAAGATCTTTCCTATACGTCAAGGTCTCGAGATAAAACTTTATGTCT  
CAAATAATACATGCTAGGCATATAATGACCCATTTTCTGGAGTTGATGTACTCAAGACAT  
TGGTTAAATATCAATCACGCATGATGATAGTGCGCCCTATTATAAC

1516735\_200\_4\_1

ATAGCAGAATGTGACACAAGCTATACCATACGTCTCTGATCGACATTCATGTATGGTATC  
GTCTATATCTTGTGCTTAAAGGTAGCGTATAGTAAGGTAATTACTATATGATCAATACTG  
TGTGTG TAGAGTACAATAAAATATATGGGAAGAACATAAAAAGTTCGTATTGTGACATGT  
TATTGAGGCTATGGTAAGCG

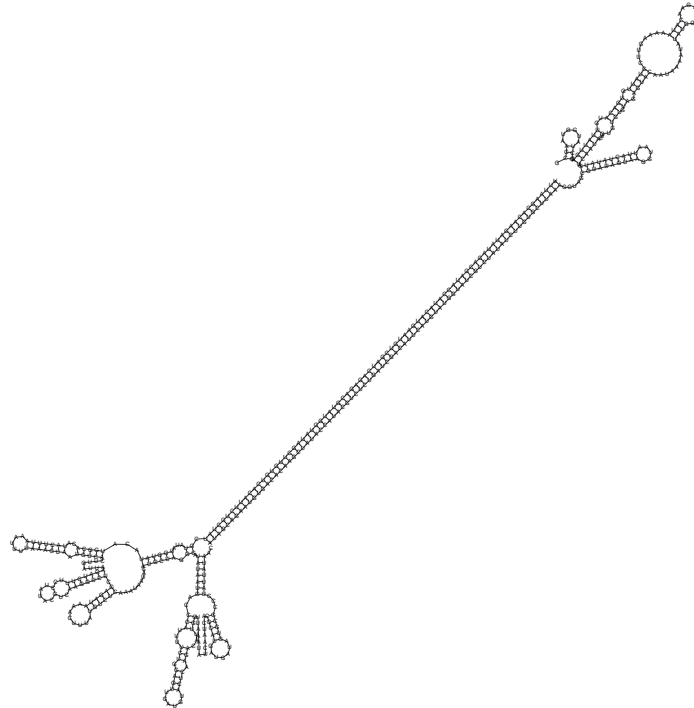

22 1518000\_200\_4\_-1 ... 1517880\_200\_4\_1

1518000\_200\_4\_-1

TTGCGTTCCTTACGTCAAAGAACAATGATGCTACGGAGCGCAAGAAAGTGACGTGGCCAAC  
TATCAGCGCGCTAGGATATGTATGCACTGCCGAAAGGCTGAAGCGTATCGTACATTAATT  
CATAAAGAGAAAGAAATCTCAACCCTGAATTTAGGATAGCGAAGTGAATAAGAAAAACT  
TTACCATTGTTTTTCAGGATG

1517880\_200\_4\_1

GATATCCGCTCGAGATTAAGTGCGGCCCTCTCCACCCGATAAGGAACAAAGGGCATGCTT  
CCTTTTTTAGCTTTACGCACTATTGTCAAATTTATATAAACAGGCTGATATAGAATT  
CATCCTGAAAACAATGGTAAAGTTTTTCTTATTGCACTTCGCTATCCTAAATTCAGGGTT  
GAGATTTCTTTCTTTTATG

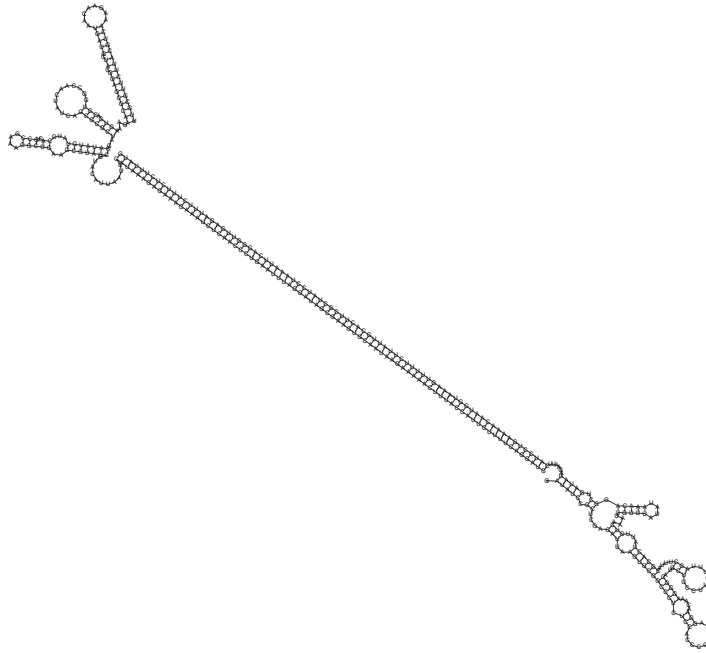

23 77751\_161\_5\_-1 ... 77832\_120\_5\_1

77751\_161\_5\_-1

TAATTTGGAAACTATCCACCTTGAAGATTCCCACTAAATCTTCGAAGGACGACGATTTTC  
TTCGAGGTTGAAAAAAGTTTTCAAGAATTTTCGCGCTTCTCCTAATCGGGAATTTATC  
TGTCATAATTATAATTCCTATTTGGAATTGGAACGAAAT

77832\_120\_5\_1

AACTTTTTTCAACCTCGAAGAAAATCGTCGTCCTTCGAAGATTTAGTGGGAATCTCAA  
GGTGGATAGTTTCAAATTAACCTGCAGAAGAGGCTTTTAAACATGCCTGAGGTATAA

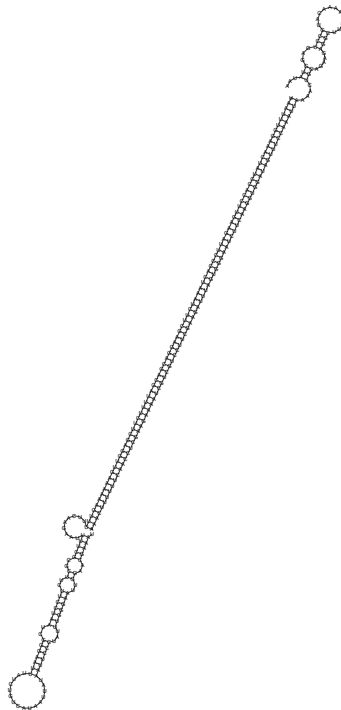

24 322046\_121\_5\_-1 ... 322006\_121\_5\_1

322046\_121\_5\_-1

GATTAAACAATGGCATTCTATGGATTTGTTGTTCTCTTTATATATTTGAGGAAAATTCA  
AAGATAATGGGGAGAAAGGTGGAGATGTATCTCCACCTATCGTAAATTTGAAAGTTCCGC  
T

322006\_121\_5\_1

TAAAAAGCGTTGCGTGATGTTGGGTGCAATTGGCGGAAAAGCGGAACTTTCAAATTTAC  
GATAGGTGGAGATACATCTCCACCTTTCTCCCATTATCTTTGAATTTTCTCAAATATA  
T

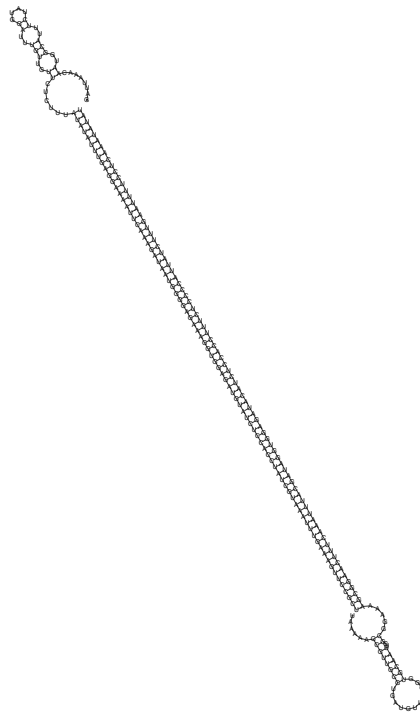



25 559168\_200\_5\_-1...559126\_122\_5\_1

559168\_200\_5\_-1

CAAGAGACTATACATCCACAATTGATTCGGTAGGTGCTTTTATACTGATTCATTTGAGG  
TCTTGGCATTGTCAATTGAAGTACATTTAGTTGAAAAGTTGAGATTTATTTAGGATGA  
GCTTGCCGCGGCATGGGAAAGAAACACTTCATCCTGTATGGAGAAAAACCACTTTGCCG  
CGGCACATCAAAACAGGGCT

559126\_122\_5\_1

ATGCGATTGTCGTGTAATGGTATCGCGCATACTGAAGTTTCAGCCCTGTTTTGATGTGC  
CGCGCAAAGTGGTTTTTCTCCATACAGGATGAAGTGTTCCTTTCCCATGCCGCGCAA  
GC

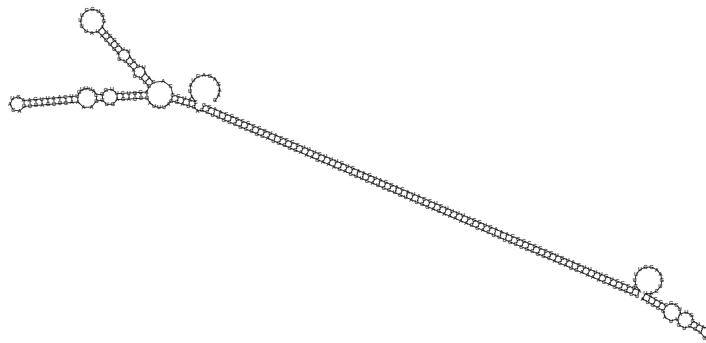

26 99910\_119\_6\_-1 ... 177336\_121\_1\_1

99910\_119\_6\_-1

GTTTTTCTCCTAGCAACCGTTTAGTGCCAAGGGTTAGGCAATTGAACGAGGCCAAGACA  
ATATTGGCTTTGCTTCTATTACTTGGCTAACATTGTGTCTGCAGGTCGAAAGGCACCTT

177336\_121\_1\_1

AAAAGTGCCTATAGGGCTGCAGCTGCAGTTTTGGCCAAGAAATAGAACCAAAGCCAAATT  
TATTTGGGCCCTCGTTCAAGGGCCATCTCACCTTGGCACTAAACGGTTAGTAGGAGGG  
A

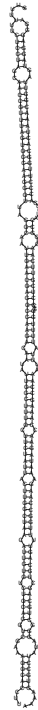

27 255367\_120\_6\_-1 ... 255408\_119\_6\_1

255367\_120\_6\_-1

CGTTTGTGGAAGATAGCGAAATACCTTACTGGAGCAACCAGGAAAAATACTCTGGTTGC  
AAAAACCAACAAAAGAAAAATGGAAGACCTAAGA ACTATGCATTTTTTTTTAAGGGTT

255408\_119\_6\_1

TTTTCTTTTGTGGTTTTTGC AACAGTATTTTTCTGGTTGCTCCAGTAAGGTATTT  
CGCTATCTTCCAACAAACGGGGCACACGTGCGGGAGTTCAAAGGGGCAGAATAGTGGG

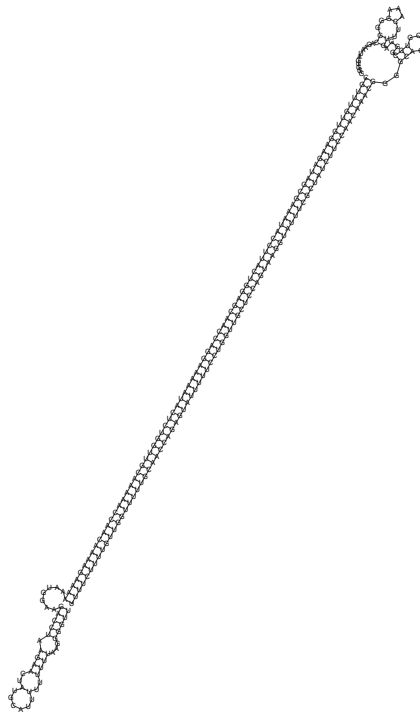

28 268591\_148\_6\_-1...268349\_431\_6\_1

268591\_148\_6\_-1

TTGATCTGAGAGAAGTTAGTGATATGAAATATCAATACATAGTATCTTATTTAGATTACG  
CATACCTTTTTTTTTCTGCAATTGAGGCAGGATTTATTCCTACATAGTACTGCTTTTTAC  
ATTGTATTGTTTTTTTTGTTTTTCTTT

268349\_431\_6\_1

GATTTCTTCTCGAGTCATATATACTATTACATGAGTTCGAGTATGGTGTGTTTTCTTTA  
GAATGTCTTATCAAGACCGACAATTCATACAGGTCGAGATATGTAAAGTCTACATGCCGA  
GCTAGGATGAGAAAAAAGTATACAAATTGCAGGCAAATAAACACACCAAAAAGATACTAA  
AAAAATCTTTTAAAGTTTTGGTTAGTTATTGGGGATCATCATGCATTTAACGACAACAGA  
GAAAAGAAAAACAAAAAAAACAATACAAATGTAAAAAGCAGTACTATGTAGGAATAAATC  
CTGCCTCAATTGCAGAAAAAAAAGGTATGCGTAATCTAAATAAGTACTATGTATTGAT  
ATTCATATCACTAACTTCTCTCAGATCAAATATGATTTAAAGGAGCGATTTCTGGACTG  
TACAAAAAAA

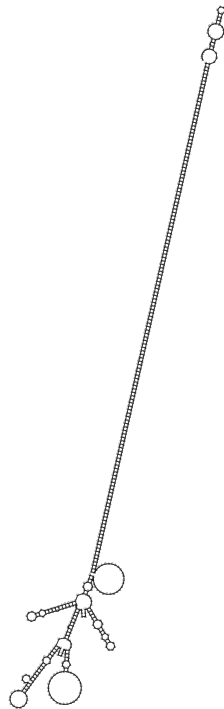

29 16965\_130\_7\_-1 ... 17016\_121\_7\_1

16965\_130\_7\_-1

TCGGAAATCATGTTTATGTCAAAATTTACTAGCCATTCCAATAATGTATTTATTATTA  
TATATATATACTTCAAGGTCTGATGGGGTGCTGTAGCATTGCGATGTAGCGATAGCAA  
TTGAAAATAA

17016\_121\_7\_1

ACCTGAAGTATATATATATTTAATAATAAATACATTATTGGAATGGCTAGTAAATTTG  
ACATAAACATGATTCCGAACGAATTAATAACAGTTGATTTAGGAGAAAGTATCAGTAC  
A

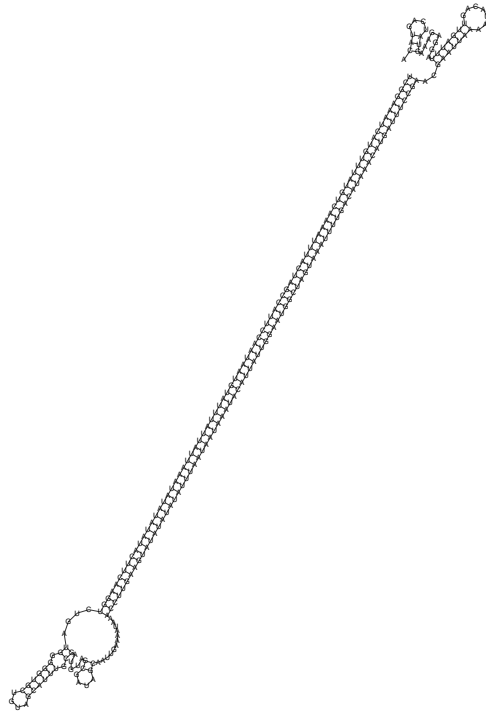

30 166663\_122\_7\_-1...166622\_123\_7\_1

166663\_122\_7\_-1

ATTTCAGAATTGTAATATCGGACGGCAATACTAGTGTAACTGAACCACAAGGTTAGTCT  
TAGCTGGGTAAAACACCTGGCGAAAAGAAGAAAAAATAAGGAATCTGGATGATTATAAA  
CT

166622\_123\_7\_1

TGTATGCCCTTTTCATGTATAAAGAAGGTAATTTAAAAAGTTTATAATCATCCAGAT  
TCCTTATTTTTTTCTTCTTTCGCCAGGTGTTTTACCCAGCTAAGACTAACCTTGTGGTT  
CAG

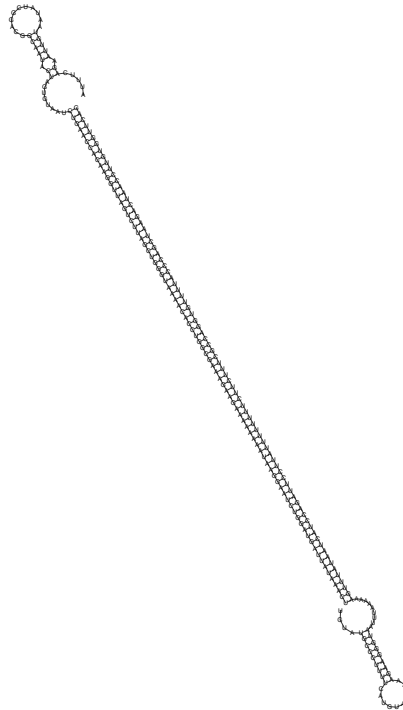

31 884266\_119\_7\_-1...884226\_119\_7\_1

884266\_119\_7\_-1

GTAACCCGTACATGCCCAAAATAGGGGGCGGGTTACACAGAATATATAACATCGTAGGTG  
TCTGGGTGAACAGTTTATTCTGGCATCCACTAAATATAATGGAGCCCGCTTTTAAAGC

884226\_119\_7\_1

AATATTTTGGTGCTGGGATTCTTTTTTTTTCTGGATGCCAGCTTAAAAAGCGGGCTCCAT  
TATATTTAGTGGATGCCAGGAATAAACTGTCACCCAGACACCTACGATGTTATATATT

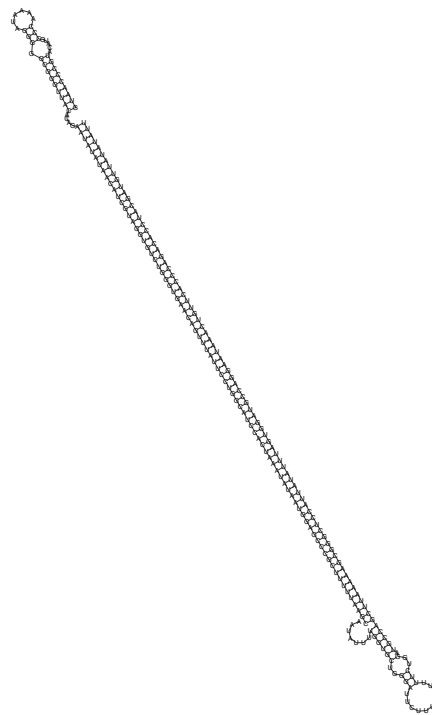

32 5973\_130\_8\_-1 ... 1269\_305\_4\_1

5973\_130\_8\_-1

TGGTTTACATTTAAGGTGCGACCAGCAATGTCACTGCTCGTACAGCGGTTACCGCTTGAA  
TGAAATACATATTTAAGCGTAGATTTCCCTGTGACAAAACGTGTAAACATCTAGTAGAA  
AATAGACGTA

1269\_305\_4\_1

CTATTGACATGGTATCGAAAGGTTGTCCACATTGGGAAGTAACTTGGTTCTATGAATCTT  
CATGTCAGATACGTAGGACAGACTCTTTCCTGTGTAATAATTTGTGACAGCTACGTCTAT  
TTTCTACTAGATGTTTACACAGTTTTGTACAGGAAATCTACGCTTAAAATATGTATTTT  
ATTCAAGCGGTAACCGCTGTACGAGCAGTGACATTGCTGGTCGCACCTTAAATGTAAACC  
AACGTTACGGCACACCGTGATGTACCCGCATTAAGTTTTGTAATTCGTTATTACGATT  
ATTGA

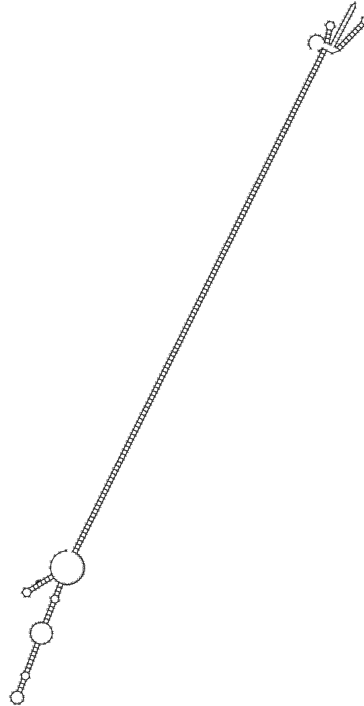



33 50784\_119\_8\_-1 ... 50743\_119\_8\_1

50784\_119\_8\_-1

TCGTAGATTGGCATCCCTCACCCGTCTGAAATGATTTTATAAGCCTCCGTCATCTCGGAC  
GTAATTTTAGAAACTCCGAGCTGGACGGCTATTTTATTTCTGCGCCGTAATCTGTGAA

50743\_119\_8\_1

AATAATCTAAATACCGGTTTCGTGCGAGACATTCTCTGTGATTCACAGATTACGGCGCAG  
AAAATAAAATAGCCGTCCAGCTCGGAGTTTCTAAAATTACGTCCGAGATGACGGAGGCT

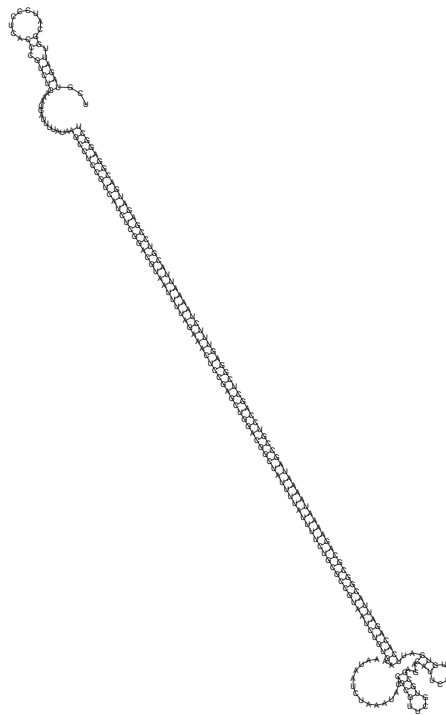

34 236637\_122\_8\_-1...236597\_120\_8\_1

236637\_122\_8\_-1

TGCGAGTGAATAGGGAGAACCAAAATAAATAGGGAGAACTTGCTTTTTCTTCTATTTGAG  
TAACAACCTAGGTTGCCAAGAATATATATATTCTGCCAACTACCACGTTGTTACGGTAGTG  
AG

236597\_120\_8\_1

TAAAAGTATTTTAGTTTGTGTTGTAATTCGTCTTTTCTCTACTACCGTAACAACGTG  
GTAGTTGGCAGAATATATATATTCTTGGCAACCTAGTTGTTACTCAAATAGAAGAAAAAG

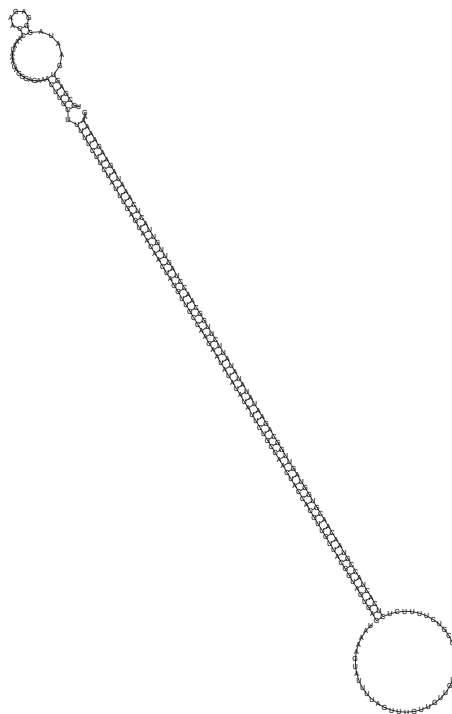

35 31990\_120\_8\_-1...31950\_120\_8\_1

31990\_120\_8\_-1

TTAGCGCTTTCTCAGGATTTGCGCTTCGCACGGTTTTTTCTTCTAGGCGGTTTATAAGA  
AGAAAAATAACGGAAAAACAATGGCGAGGTTTGGTAACTGCGCCATTTGCTTCTTT

31950\_120\_8\_1

CAAGGTTAGCGCTTACGGACTTTATTGCTATTCTAGTCAAAGAAAGCAAATGGCGCAG  
TTACCAAACCTCGCCATTTGTTTTTCCGTTATTTTTCTTCTTATAAACGCGCCTAGAA

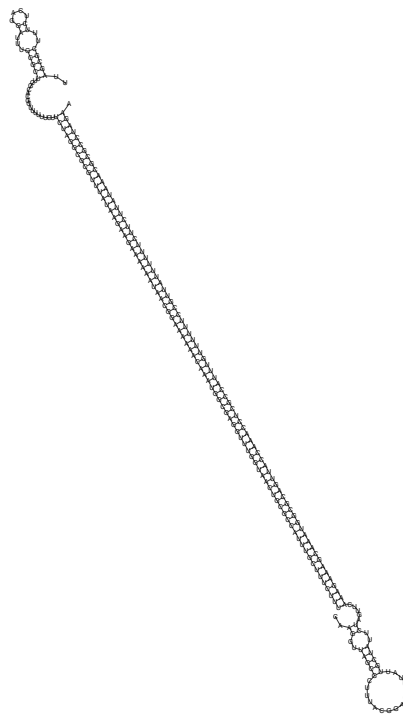

36 117760\_117\_9\_-1...117720\_237\_9\_1

117760\_117\_9\_-1

TGATAAACTTTTTCTTTTCTCAGTGCCAAATTGGTGTCTTCTTTTTTTGCCACGGGGCGG  
GTA CTAGATAGTCACGTGAATGTATACACGTGACCCTAATGCTCTTTGAAAAATTTT

117720\_237\_9\_1

GCCAGCTATATTTCCATATTCCTTAGTTAAAGCTCATCGCAAAATTTTTCAAAGAGCATT  
AGGGTCACGTGTATACATTCACGTGACTATCTAGTACCCGCCCGTGGCAAAAAAAGAAG  
ACACCAATTTGGCACTGAGAAAAGAAAAGTTTATCAATAACGAAAACGAACTTAAGAG  
GAAAAAGAGTATAGAGAAAAACAAAGGCAATCAGCGGCTAATTTGGTGAAATAACA

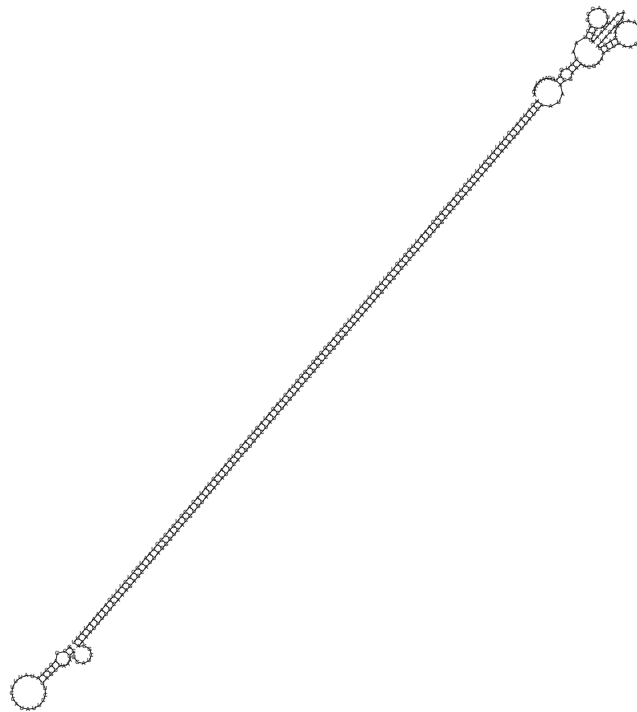

37 2096\_297\_0\_-1 ... 62832\_137\_0\_1

2096\_297\_0\_-1

TCTATAAAGAAATGAGATTAGATGATATTGAAATGAAATAAAATGAGATGAGATGAATTG  
GGGCCCGAAAGGGACCGAACCCCTCATAATAATTAATTTAATATATATTATAATAAAAC  
TTATTATATATATTTTTATATATATATATATATTTTTTTTTATATATTATATAATAAATAT  
TACTTCTTATTAATAATTCCTTATTTTTATTATTTTTAATAATTAATTCATATAGTTATT  
ATAATATATAGATAAACTCCTTTCGGGGTTCCGGCTCCCGTGGCCGGGCCCGGAAC

62832\_137\_0\_1

ATATATTATTAATTTAATAATTATTATAATAGTTCCGGGGCCCGCCACGGGAGCCGGAA  
CCCGAAAGGAGTTTATAAAAAGATATTTTTATATTATATTATATTATTTAATAAAT  
ATTACCTTTTTTTATTA

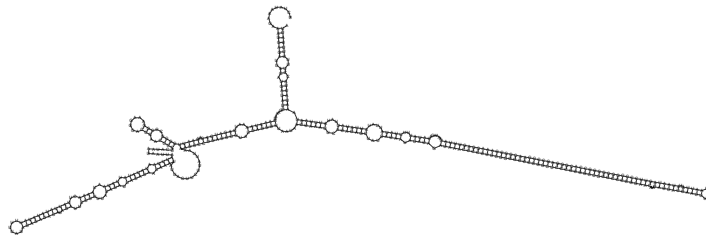

38 29783\_136\_0\_-1 ... 29726\_260\_0\_1

29783\_136\_0\_-1

TAAATATGAATATTATTAATAAATATGTTATAATTTCTCCTTCCGGGGTTCCGGCTCCCG  
TGGCCGGGCCCCGGAACCTATATGATATAATAAATATATTATATAATAATCTTATATTTAT  
TATGTTATATTATTTT

29726\_260\_0\_1

TATAGTATTAATAAATAAATAATTTAATAAATATTATTATTAATAATATTTATTAATAA  
ATAATATAACATAAATAAATAAGATTATTATATAATATATTTATTATATCATATAGTTC  
CGGGCCCGGCCACGGGAGCCGGAACCCGGAAGGAGAAATTATAACATATTTTAAATA  
ATATTCATATTTATTTATATACAAATAAATATATTTATTTAGAATAATAAAAAAAAAATA  
ATAAATAAATATATTATTAT

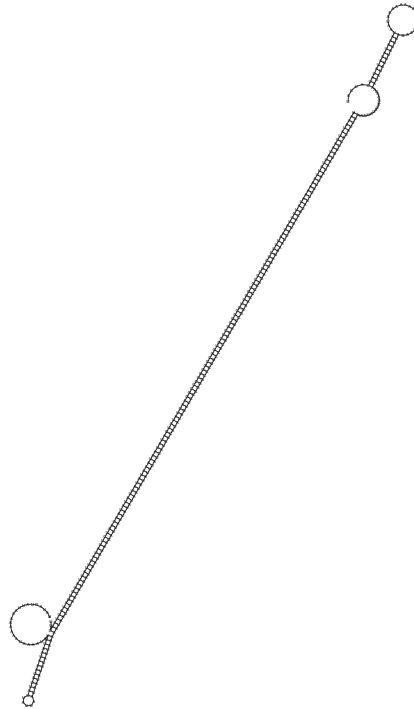

39 29783\_136\_0\_-1 ... 62832\_137\_0\_1

29783\_136\_0\_-1

TAAATATGAATATTATTAATAAATATGTTATAATTTCTCCTTCCGGGGTCCGGCTCCG  
TGGCCGGGCCCGGAACATATGATATAATAAATATATTATATAATAATCTTATATTTAT  
TATGTTATATTATTTT

62832\_137\_0\_1

ATATATTATTAATTAATAATTATTATAATAGTTCCGGGGCCCGCCACGGGAGCCGGAA  
CCCGAAAGGAGTTTATAAAGATATATTTTATATTATATTATATTATTTAATAAAT  
ATTACCTTTTTTTATTA

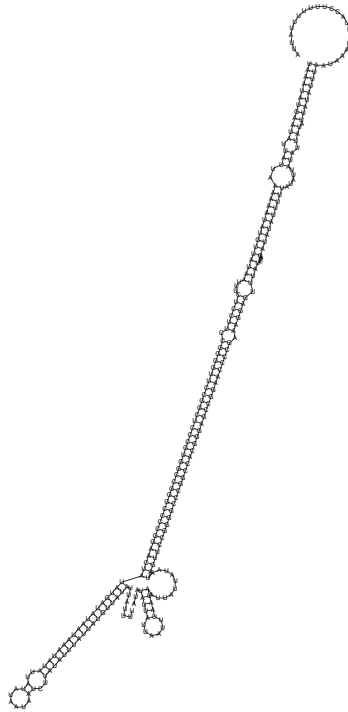

40 29783\_136\_0\_-1 ... 33146\_467\_0\_-1

29783\_136\_0\_-1

TAAATATGAATATTATTAATAAATATGTTATAATTTCTCCTTCCGGGGTTCCGGCTCCG  
TGGCCGGGCCCGGAACATATGATATAATAAATATATTATATAATAATCTTATATTTAT  
TATGTTATATTATTTT

33146\_467\_0\_-1

AGAGGGATAATTATTTTATTATATTTATATACAATAGGATTAACATTGCCAGTGAACAA  
CGGGTAATGTTTGATCCGTATCATATTATATTATATTATATTATATTATATAAATT  
AATAGTTCCGGGGCCCGGCACGGGAACCGGAACCCGAAAGGAGGAGAAGATAAATTAT  
TACTATTTTCTTTATAAAAAATAAAATAAAATAAAATAAAATAGTCCGGTAGAAAGAGAT  
ATTATAACTTTTATAAATATATTAATATATAATAATTATTATTCATTTAAAATTACAA  
TTTTCGTTTCAATTATAAATACTTTTAAATTATATTATAATATATAATTATTTATAAATA  
AGTACGCTCCGAAGGAGTGAGGGACCCCCCTTACGGGGGGAACCGAACCCCGCAGGA  
GATATTTATTAATAATGAAATTATATTAATATATTATTATTATTATA

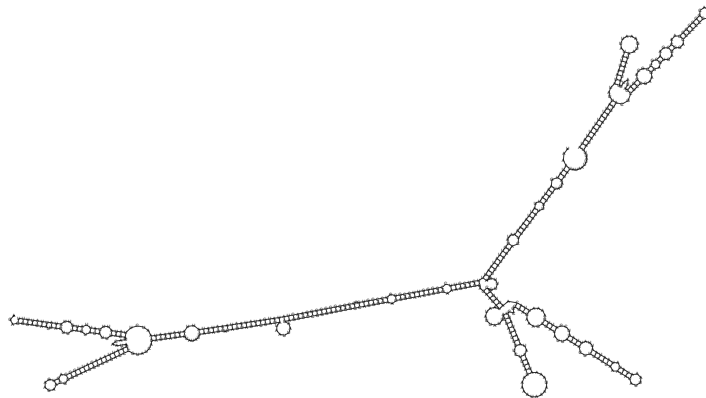



41 29783\_136\_0\_-1 ... 76206\_186\_0\_1

29783\_136\_0\_-1

TAAATATGAATATTATTAATAAATATGTTATAATTTCTCCTTCCGGGGTTCCGGCTCCCG  
TGGCCGGGCCCGGAACCTATATGATATAATAAATATATTATATAATAATCTTATATTTAT  
TATGTTATATTATTTT

76206\_186\_0\_1

TATATTTATAAATAATTAATATTTTATTTAAAATAAATAATGATTAATTTATAAATAT  
ATATTAATTAAGTTTCGGGTCCCGGCTACGGGACCCGGAACCCCGAGAGGAGTTATTAT  
ATTTATAATTAATCTTTAAATAATATATCTTAAATTATTATATTGATATTAATATTATA  
TTGATA

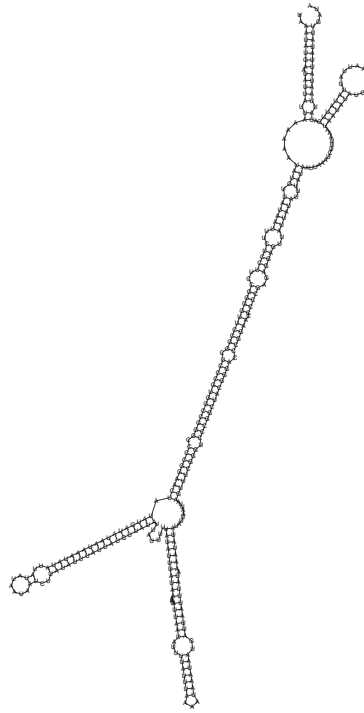

42 30507\_136\_0\_-1 ... 32419\_121\_0\_1

30507\_136\_0\_-1

TATTTCTATTTTATATACATTATTATTATATTAATTAATATGATATTATAATGGTGGGGG  
GTCCAATTATTATTGAAAATAATAATTATTAATGGGACCCAGATATCTTCTTGTTAAT  
CATTATTATTTTATT

32419\_121\_0\_1

AATAAAATAATAAATGATAACAAGAAGATATCCGGTCCAATAATAATTATTATTGAA  
AATAAATTTGGGACCCATATAGAATATAAATAATTAATATATATATAAATAATAA  
T

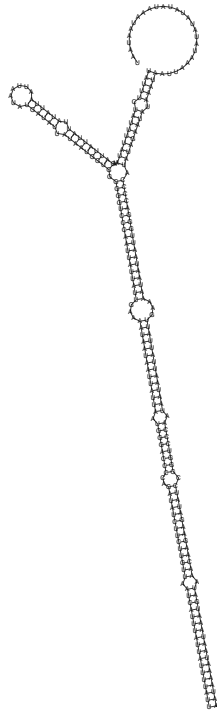

43 30507\_136\_0\_-1 ... 45142\_123\_0\_1

30507\_136\_0\_-1

TATTTCTATTTTATATACATTATTATTATATTAATTAATATGATATTATAATGGTGGGGG  
GTCCAATTATTATTGAAAATAATAATTATTAATGGGACCCAGATATCTTCTTGTTAAT  
CATTATTATTTTATT

45142\_123\_0\_1

TAAATAATATAATAAATGATAAACAAGAAGATATCCGGGTCCAATAATAATTATTATTG  
AAAATAATAATTGGGACCCCATCTAAAATATATATATAACTAATAATATATTATATATA  
TTA

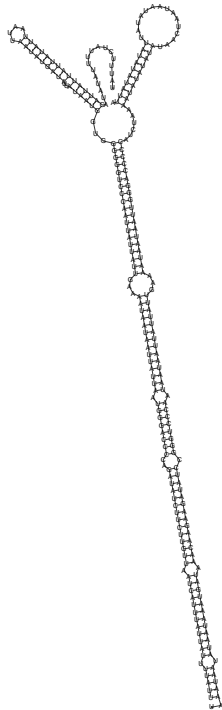

44 33146\_467\_0\_-1 ... 34913\_97\_0\_-1

33146\_467\_0\_-1

AGAGGGATAATTATTTTATTATATTTATATACAATAGGATTAACATTGCCAGTGAACAA  
CGGGTAATGTTTGATCCGTATCATATTATATTATATTATATTATATTATATAAATT  
AATAGTTCGGGGCCCGGCACGGGAACCGGAACCCGAAAGGAGGAGAAGATAATATTAT  
TACTATTTTTCTTATAAAAAATAAAATAAAATAAAATAAAATAGTCCGGTAGAAAGAGAT  
ATTATAACTTTTATAAATATATTAATATATAATAATTATTATTCCATTTAAAATTACAA  
TTTTCGTTTCAATTATAAATACTTTTAAATTATATTATAATATATAATTATTTATAAATAAT  
AGTACGCTCCGAAGGAGTGAGGGACCCCCCTTACGGGGGGAACCGAACCCCGCAGGA  
GATATTTATTAATAATGAAATTATATTAATATATTATTATTATTATA

34913\_97\_0\_-1

TTTATTAATATAATTTATATATTTATCTTATTCTCCTTTCGGGGTTCCGGCTCCCGTGG  
CCGGGCCCCGGAAC TATTAATATATAAATTGAATTAT

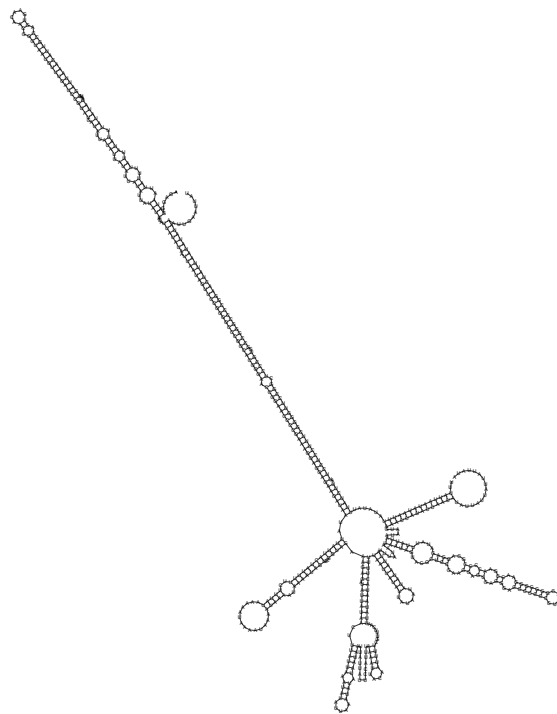

45 33146\_467\_0\_-1 ... 29783\_136\_0\_-1

33146\_467\_0\_-1

AGAGGGATAATTATTTTATTATATTTATATACAATAGGATTAACATTGCCAGTGAACAA  
CGGGTAATGTTTGATCCGTATCATATTATATTATATTATATTATATTATATAAATT  
AATAGTTCGGGGCCCGGCACGGGAACCGGAACCCGAAAGGAGGAGAAGATAATATTAT  
TACTATTTTTCTTATAAAAAATAAAATAAAATAAAATAAAATAGTCCGGTAGAAAGAGAT  
ATTATAACTTTTATAAATATATTAATATATAATAATTATTATTCCATTTAAAATTACAA  
TTTTCGTTTCAATTATAATACTTTTAAATTATATTATAATATATAATTATTTATAAATAAT  
AGTACGCTCCGAAGGAGTGAGGGACCCCCCTTACGGGGGGAACCGAACCCCGCAGGA  
GATATTTATTAATAATGAAATTATATTAATATATTATTATTATTATA

29783\_136\_0\_-1

TAAATATGAATATTATTAAAAAATATGTTATAATTTCTCCTTCCGGGGTTCGGGCTCCCG  
TGGCCGGCCCCGGAACCTATATGATATAATAAATATATTATATAATAATCTTATATTTAT  
TATGTTATATTATTTT

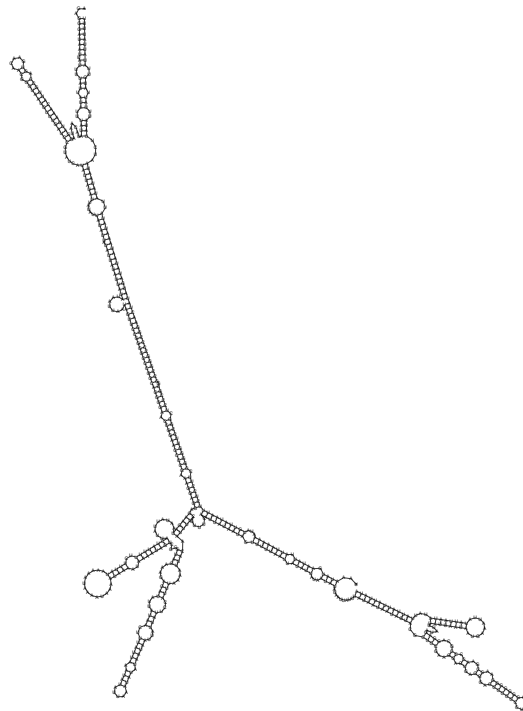

46 34913\_97\_0\_-1 ... 62832\_137\_0\_1

34913\_97\_0\_-1

TTTATTAATATAATTTATATATTTATCTTATTCCTCCTTTCGGGGTTCCGGCTCCCGTGG  
CCGGGCCCCGGAAC TATTAATATATAAATTGAATTAT

62832\_137\_0\_1

ATATATTATTAATTTAATAATTATTATAATAGTTCCGGGGCCCGCCACGGGAGCCGGAA  
CCCGAAAGGAGTTTATAAAAGATATATTTTATATTATATTATATTATTTAATAAAT  
ATTACCTTTTTTTATTA

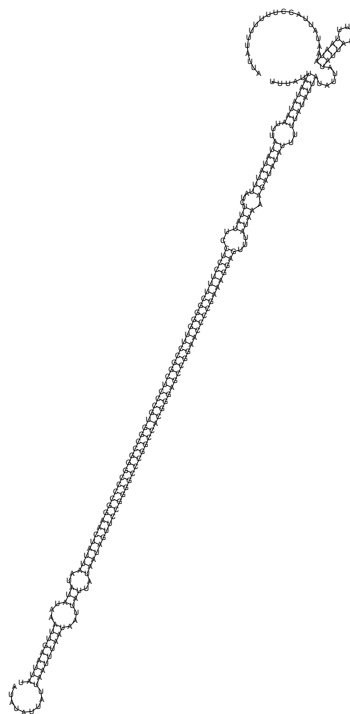

47 34913\_97\_0\_-1 ... 33146\_467\_0\_-1

34913\_97\_0\_-1

TTTATTAATATAATTTATATATTTATCTTATTCTCCTTTTCGGGGTTCCGGCTCCCGTGG  
CCGGGCCCCGGAAC TATTAATATATAAATTGAATTAT

33146\_467\_0\_-1

AGAGGGATAATTATTTTATTATATTTATATACAATAGGATTAACATTGCCAGTGAACAA  
CGGGTAATGTTTGATCCGTATCATATTATATTATATTATATTATATTATATAAATT  
AATAGTTCCGGGGCCCGGCACGGGAACCGGAACCCCGAAAGGAGGAGAAGATAATATTAT  
TACTATTTTCTTTATAAAAAATAAAATAAAATAAAATAAAATAGTCCGGTAGAAAGAGAT  
ATTATACTTTTATTAAATATATTAATATATAATAATTATTATTCCATTTAAAATTACAA  
TTTTCGTTTCAATTATAACTTTTAAATTATATTATAATATATAATTATTTATAATAAT  
AGTACGCTCCGAAGGAGTGAGGGACCCCCCTTACGGGGGGAACCGAACCCCGCAGGA  
GATATTTATTAATAATGAAATTATATTAATATATTATTATTATTATA

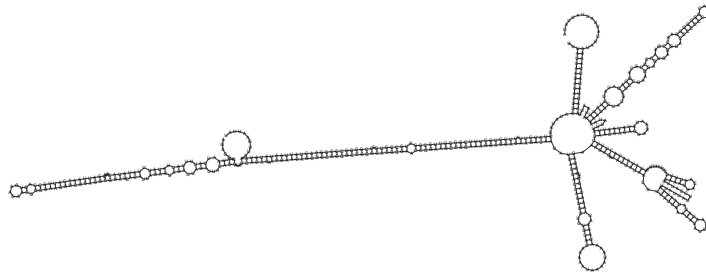

48 34913\_97\_0\_-1 ... 29726\_260\_0\_1

34913\_97\_0\_-1

TTTATTAATATAATTTATATATTTATCTTATTCCTCCTTTCGGGGTTCCGGGCTCCCGTGG  
CCGGGCCCCGGAACCTATTAATATATAAATTGAATTAT

29726\_260\_0\_1

TATAGTATTAATAAAAAAAAAATAAAATATTTAATAAAATATTATTATTAATAATATTTATTAATA  
ATAATATAACATAATAAAATATAAGATTATTATATAATATATTTATTATATCATATAGTTC  
CGGGCCCCGGCCACGGGAGCCGGAACCCCGGAAGGAGAAATTATAACATATTTTTTAATA  
ATATTCATATTTATTTTATATACAAATAAATATATTTATTTAGAAATAATAAAAAAAAAATA  
ATAAATAAATATATTATTAT

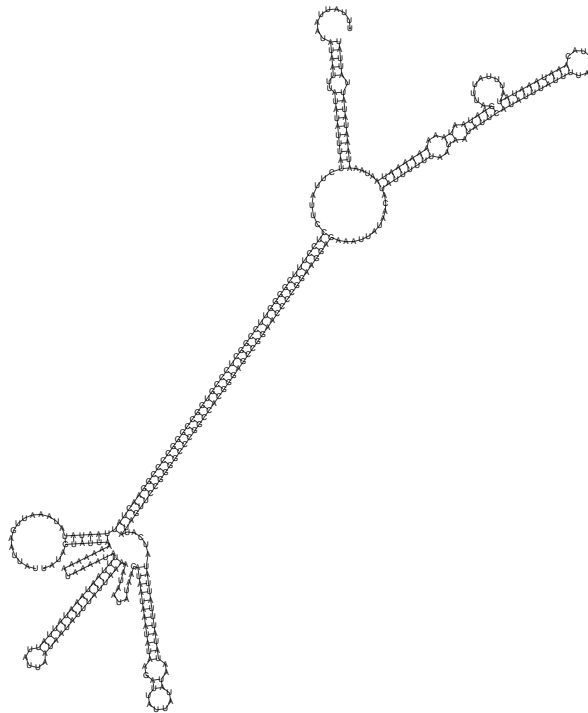



49 68417\_160\_1\_1 ... 68377\_120\_1\_-1

68417\_160\_1\_1

AAACGGGTAAAACAGCCATGCACCGCAGCAGCTCGACGAGGTGATATTTCCAATTTGGGA  
AATTTCCCAAATCAGTAATGTAGCCTCTACGGGTGTCTCTGTTCAGCCCCGTGGTCGCCAG  
CACAGAATGTATCGTACCCCTGAAGGTAGTTTTTTACCGC

68377\_120\_1\_-1

CATTACTGATTTGGGAAATTTCCCAAATTTGAAATATCACCTCGTCGACGTGCTGCGGTG  
CATGGCTGTTTTACCGTTTTAGGAAAAAACTCGGCGGGTTTTCTTGACGGGCAAATGTCG

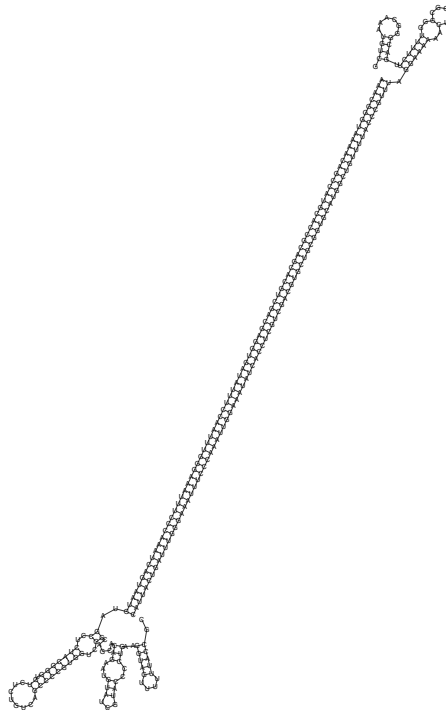

50 177336\_121\_1\_1...177376\_120\_1\_-1

177336\_121\_1\_1

AAAAGTGCCTATAGGGCTGCAGCTGCAGTTTTGGCCAAGAAATAGAACCAAAGCCAAATT  
TATTTGGGCCCTCGTTCAAGGGCCATCTCACCCCTGGCACTAAACGGTTAGTAGGAGGG  
A

177376\_120\_1\_-1

TTAATTTTTCATTGTTTCTAATTTGGGAAAAGTCCGATTTCCCTCCTACTAACCGTTTAG  
TGCCAAGGGTGAGATGGCCCTTGAACGAGGGCCAAAATAAATTTGGCTTTGGTTCTATT

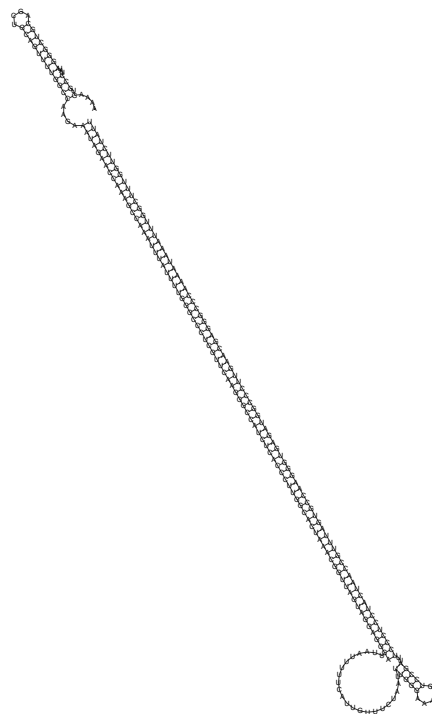

51 177336\_121\_1\_1...99910\_119\_6\_-1

177336\_121\_1\_1

AAAAGTGCCTATAGGGCTGCAGCTGCAGTTTTGGCCAAGAAATAGAACCAAAGCCAAATT  
TATTTGGGCCCTCGTTCAAGGGCCATCTCACCTTGGCACTAAACGGTTAGTAGGAGGG  
A

99910\_119\_6\_-1

GTTTTTCTCCTAGCAACCGTTTAGTGCCAAGGGTTAGGCAATTGAACGAGGCCAAGACA  
ATATTGGCTTTGCTTCTATTACTTGGCTAACATTGTGTCTGCAGGTCGAAAGGCACCTT

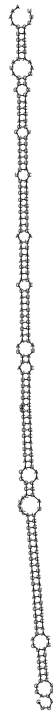

52 144176\_119\_11\_1 ... 144137\_119\_11\_-1

144176\_119\_11\_1

GTGACTGAAATAGAAGGATAAAATCATGCATCTCCAGGATTATCCCTACTCCATTCATT  
ACAACATGCGCCAAATCAAGCCTATATAAGATTCTCGTCATTTAGCATGCTCTATTGAT

144137\_119\_11\_-1

CTTGATTTGGCGCATGTTGTAATGAATGGAGTAGGGATAATCCTGGAGATGCATGATTTA  
TCCCTTCTATTTAGTCGACGGCGAAATATGCCAAATTTAGAAAGCCCTCGGCCTTGA

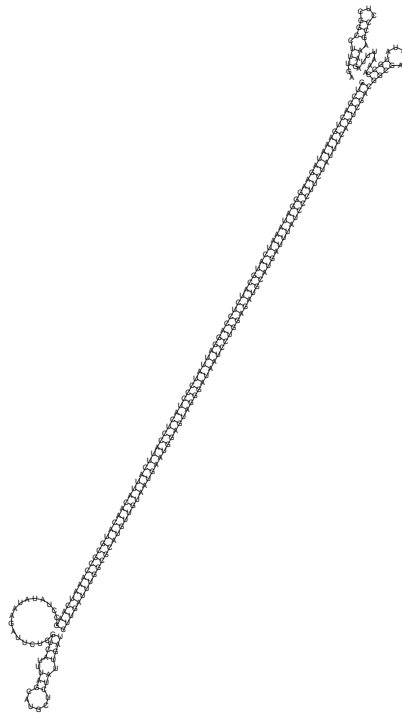

53 289817\_120\_12\_1 ... 289857\_120\_12\_-1

289817\_120\_12\_1

GGAGATATCTGCGCCGTTTCAGGGGTCCATGTGCCTTGGACGATATTAAGGCAGAAGGCAG  
TATCGGGGCGGATCACTCCGAACCGAGATTAGTTAAGCCCTTCCCATCTCAAGATGGGA

289857\_120\_12\_-1

TGCACAGTTAACTTTCTAGCAGGAGTATAATGCCATTGCTCCCCATCTTGAGATGGAA  
GGGCTTAACTAATCTCGGTTCCGAGTGATCCGCCCCGATACTGCCTTCTGCCTTAATATC

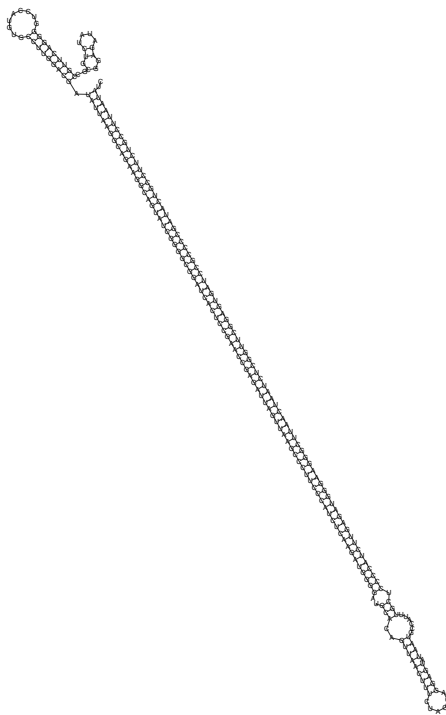

54 534573\_158\_12\_1 ... 534534\_117\_12\_-1

534573\_158\_12\_1

GTTTTCCAAGTCATCTCAAAACAATGACCTATTTTATTCTAGATAAACCTGGGTAA  
GCAGGGTTAATTTGTCCCAAACGGGC AAAATATAAATACCCCTTCGGGAAATAAACTA  
AAAAGAGTTCTAATTAGCCAATTGGCAAGAAAGCTCGA

534534\_117\_12\_-1

GGACAAAATTAACCCTGCTTACACCAGGGTTTATCTAGAAAATAAAATAGGTCATTGTTTT  
GAGATGACTTGAAAAA ACTTAACCCTGATGTGACTGTAACATAACATCTAAGAAAAA

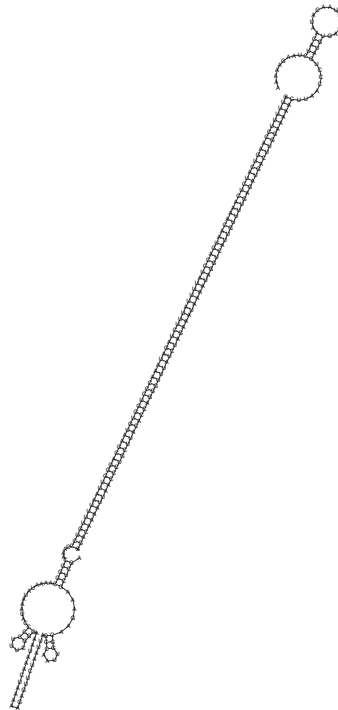

55 602614\_121\_12\_1 ... 602654\_123\_12\_-1

602614\_121\_12\_1

ATCGATTTCCGGTGACTAGTTAGTAGATGATGTAATCGTAGACGCAGGGAACCCTTGCTTT  
TCCCAATCGTAACAAAAAAAAACAAGGGGAAATAAACTATTAGATAGTACGAGTTCGTT  
A

602654\_123\_12\_-1

GTAATCATTTCGTTCTTCGACTTTTATAGCCTTTTTTTTAACTTAACGAACTCGTACTATC  
TAATAGTTTATTTCCCTTGTTTTTTTTTGTACGATTGGGAAAAGCAAGGGTCCCTG  
CGT

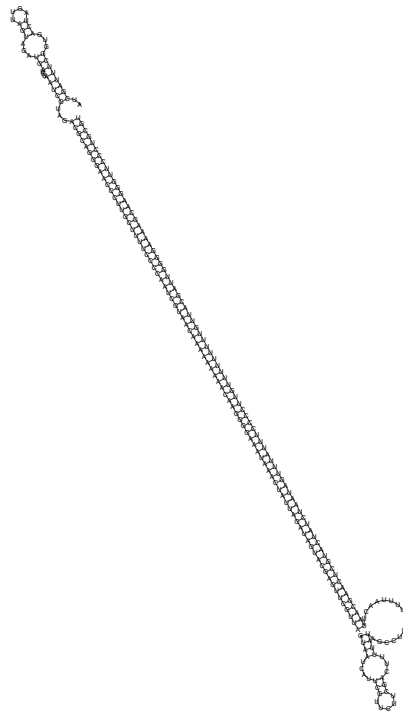

56 789982\_162\_12\_1 ... 789942\_120\_12\_-1

789982\_162\_12\_1

AAAACGGAAAAAATCTAAAAAAGAAATTAATTGAGAGATCTCACGAAATGCCGCGAG  
GAATGTTTCTCGAGGCTGAGCGCGTGGTCTGTGCAAAAAAATGGCAATTTTTTTGTAGG  
AGTTTGCATTGGGCCATTGAGAAGGAGCACCGTTAGATGGGA

789942\_120\_12\_-1

CTCAGCCTCGAGAAACATTCCGCGGCATTTCCGTGAGATCTCTCAATTAATTTCTTTT  
TTTAGATTTTTTCCGTTTTCCGTTTGAATAATTTCCGTTTTTCGTAGAGCGCGACGGCC

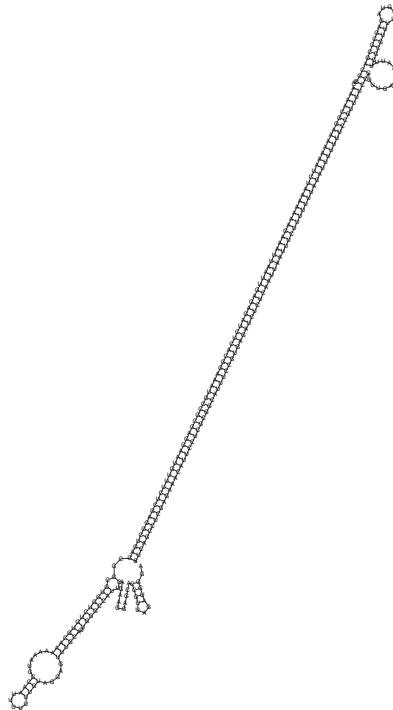





58 481942\_123\_13\_1 ... 481901\_121\_13\_-1

481942\_123\_13\_1

GCTACTGTTCAATAAAATATTGTTGTAATGAAGACGGTCCAACGTACAAAATACAGCAAAC  
TGTCATATATAAGGAGTCTTATGTGACAGCACTTGCGTTATTGTCAGCCGGAGTATGTCT  
TTG

481901\_121\_13\_-1

AAGACTCCTTATATATGACAGTTTGTGTATTTGTACAGTTGGACCGTCTTCATTACAAC  
AATATTTATTGAACAGTAGCTTGTAAATAGCCGGCATTTTTTTGGTTAATAACAATGCCA  
G

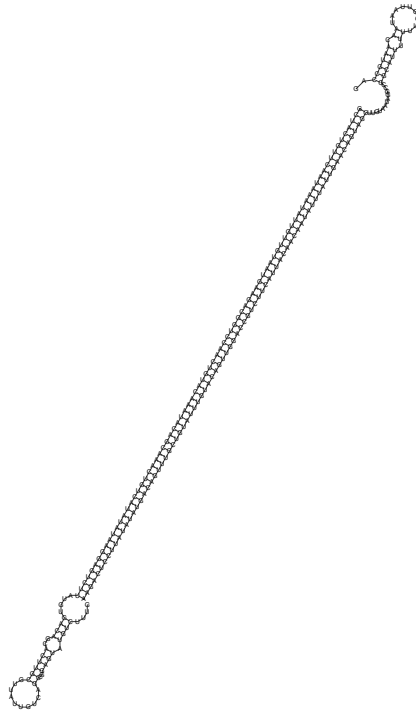

59 861651\_124\_13\_1 ... 861691\_124\_13\_-1

861651\_124\_13\_1

CAGTACACTTCGGTAGCAACCTTCGTTTGTGATTGTCTTGGTAATTGCTTCCAACAACCTT  
TATCCATCATTGAGACAGGGGCCATATCACCCGCGGGGTCTCAAAGAAGGGGCCCACTAA  
TAAA

861691\_124\_13\_-1

TTATTTGGGAGCTTTTTTGTGGCATTCTTATCTCGTGCTTTTATTAGTGGGCCCTTCT  
TTGAGACCCCGGGTGATATGGCCCTGTCTCAATGATGGATAAAGTTGTTGGAAGCAA  
TTAC

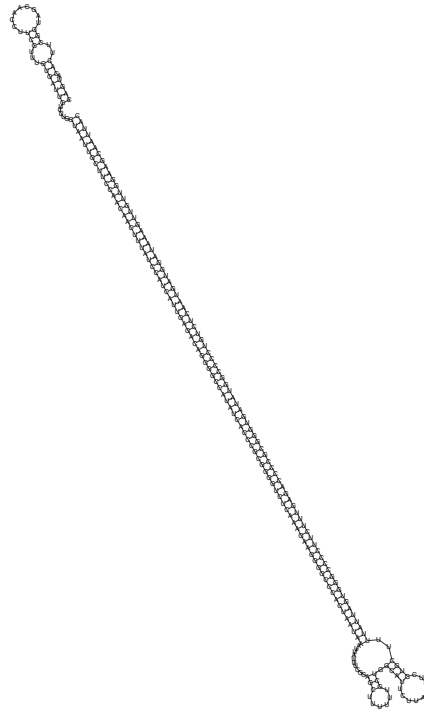

60 87556\_120\_14\_1...87516\_120\_14\_-1

87556\_120\_14\_1

CACGAACAAGAATTTTCGTGTTAAAAATCGCGTCCGGCGCGAAATTTTTCGCGGAGGCATG  
CGACGCAAAAGCGACTCGAAATGTCGGGAGCCAAATGAGGCTACAAGGCTGTGGGCAGAT

87516\_120\_14\_-1

TTCGAGTCGCTTTTTCGTGCGCATGCCTCCGCGAAAAATTTTCGCGCCGGACGCGATTTTTA  
ACACGAAATTCCTTGTTTCGTGCCGCTGTTGCCCTTTTGGGAAATATTTCCCGATCTGGCAT

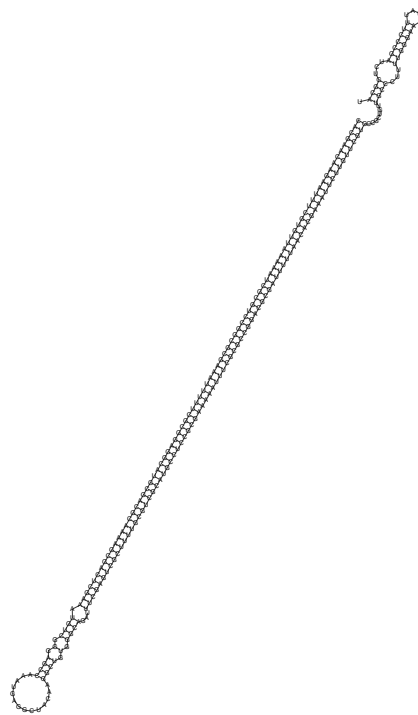

61 405776\_124\_14\_1 ... 405735\_125\_14\_-1

405776\_124\_14\_1

AAATTCAATAACTATCACTATATACGCAACAGTATTACCCTACATTGCTATCGGCTCAAT  
GGAAATCCCATATCATAGCTTCCATTGGGCCGATGAAGTTAGTCGACGGATAGAAGCGG  
TTGT

405735\_125\_14\_-1

GGAAGCTATGATATGGGGATTCCATTGAGCCGATAGCAATGTAGGGTAATACTGTTGCG  
TATATAGTGATAGTTATTGAATTTTATTACCCTGCGGGAATATTGAGACATCACTAAGCA  
CGAAT

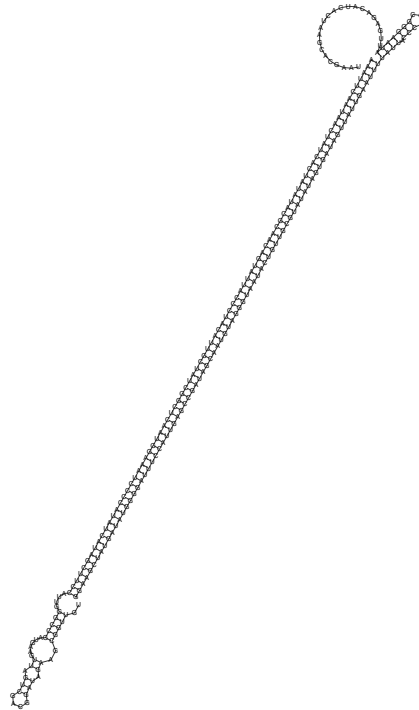

62 1004646\_121\_15\_1 ... 1004686\_117\_15\_-1

1004646\_121\_15\_1

TTGACTATTTGACTCAAATTACCAAAATCATAACTTTTCTTTTCAGCATTCCATTATTGA  
AGGCTTTAAAATAATAGTTTCTTTTTTCCTTATTATTTTATTTTTTCCTTTACATTGGAA  
T

1004686\_117\_15\_-1

AGAAAATAAAAAAATTAAAACTCAAATAAAATGTATTCCAATGTAAAGGAAAAAATAA  
AATAATAAGGAAAAAAGAACTATTATTTTAAAGCCTTCAATAATGGAATGCTGAAA

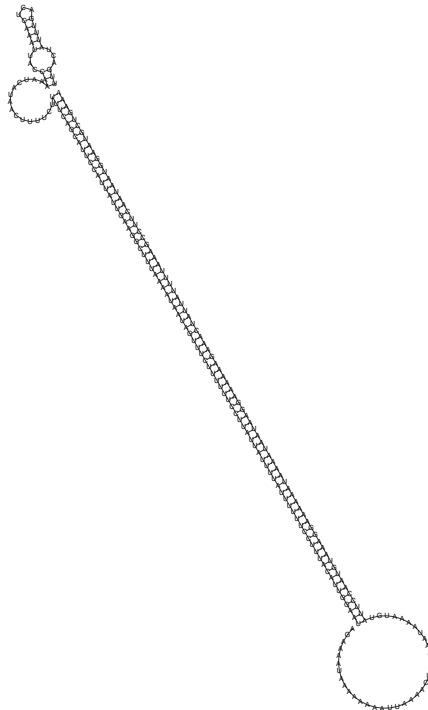

63 1057877\_121\_15\_1 ... 1057918\_121\_15\_-1

1057877\_121\_15\_1

AATTAAGTGAATTTTTTCTGGATTGATGTTCTTTCCAATTGTTGTGGTAATCCACAGC  
TGGTATAACATAAAAAAGAAGTTTTTGTAAAAAATAATTTCTCAGTAAGCATATAAG  
C

1057918\_121\_15\_-1

AATAGAATAGCGTAGTTGTTAAAATTTATTTCACTGAGGCTTATATGCTTACTGAGA  
AATTTTTTTTTTTACAAAAAATTTCTTTTATGTTATACCAGCTGTGGATTACCACAAC  
A

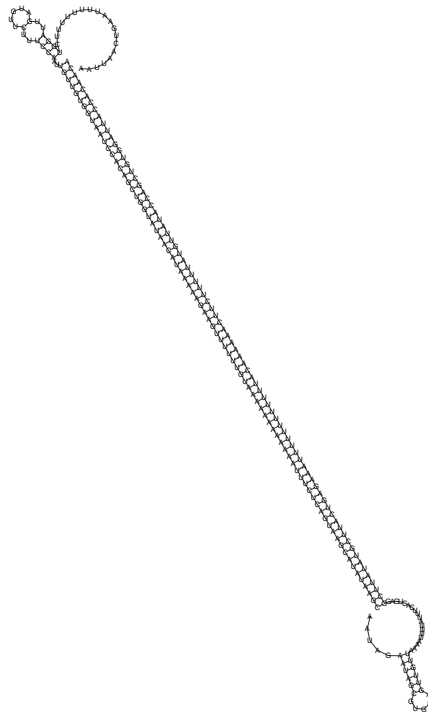

64 425897\_158\_16\_1 ... 425979\_122\_16\_-1

425897\_158\_16\_1

ATGCTGGCGTCCTTAGCCTCACGCCTACTAAACAAGAGCATCTTACTCTCACCATCCATT  
TATATACATATATAAGTACGTAAAAATAGATGTGTATAAGTCGTTCTATCTATAACGCGC  
CCGGAAGTTGTTTAGTATAACAAAAACGGAAAAAAAAA

425979\_122\_16\_-1

TCTTTCTGTCAAAC TAGCGCGCTTTTGGCAATCTCCATTTTCCTCTTTTTTTTTCCGTT  
TTTGTATACTAAACAAC TTCGGGGCGCGTTATAGATAGAACGACTTATACACATCTATT  
TT

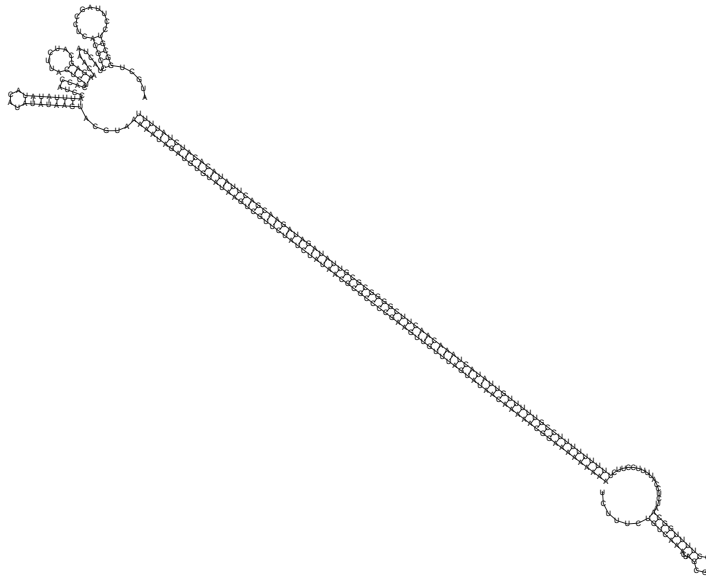



65 812831\_165\_16\_1 ... 812791\_123\_16\_-1

812831\_165\_16\_1

AGCGAGGAAAAACCTCGAGATGGAAAACCAGTTTATGGAAAACCTCAAATAACTCGCCC  
GCCTTATCGCGGGCAAACCAGCTACGAGAGATAAGGATTTGGCGCCGAGATAAGGTGGAG  
ATGTTTCTCCGCCGCGGGCACTTTTTGCCGGAACCTGGAACCTGGT

812791\_123\_16\_-1

AGCTGGTTTCCCCGCGATAAGGCGGGCGAGTTATTTTGAAGTTTTCCATAAACTGGTTTT  
CCATCTCGAGTTTTTCTCGCTTCCACGCTATGACCCTTTTTAGTTAAGGTACCCGAT  
GGC

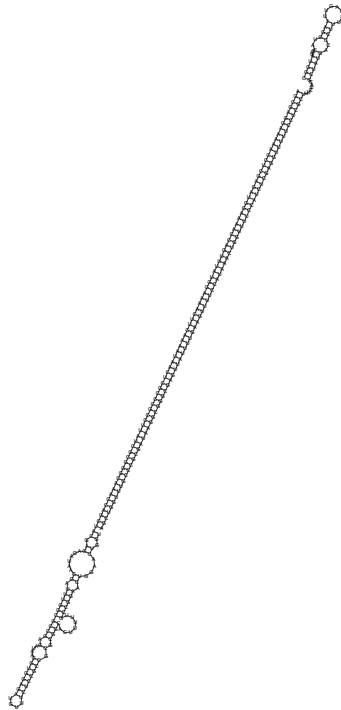

66 830605\_137\_16\_1 ... 830482\_202\_16\_-1

830605\_137\_16\_1

AAATGAAAAAATACCAGAAAAAATAACAAATCATATGCACTTCTTCATTAACGATTA  
TGAAGAAGTCTTATTTCTAACTAATATTATTATTATTATTATTATTATTATCATTACCC  
CGCTTCTTTTATTATA

830482\_202\_16\_-1

TAGAAATAAGACTTCTTCATAATCGTTAATGAAGAAGTGCATATGATTTGTTATTTTTT  
TCTGGTATTTTTTTCATTTTTTTCGGGTTTTCCTTGGGTATAATTTTTGTTTCTCCGA  
AAGACGAAAGGATGAGGAAAAACGGAGTTTCTTATTGCTTCTTTTTCCCTAATT  
TATTCACGGTGTCCATTTATTA

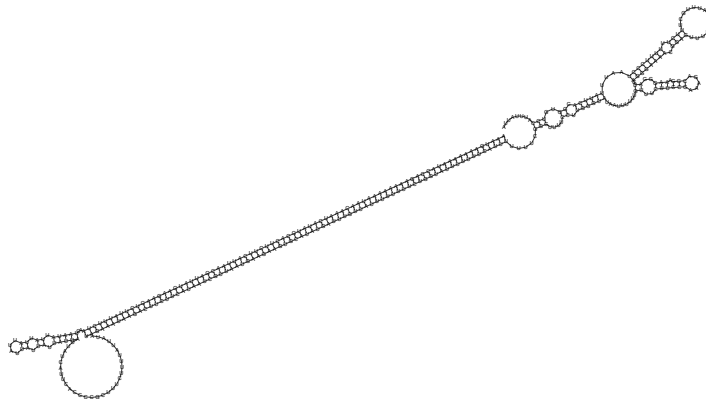

67 1269\_305\_4\_1 ... 1370\_244\_4\_-1

1269\_305\_4\_1

CTATTGACATGGTATCGAAAGGTTGTCCACATTGGGAAGTAACTTGGTTCTATGAATCTT  
CATGTCAGATACGTAGGACAGACTCTTTCCTGTGTAATATTTGTGACAGCTACGTCTAT  
TTTCTACTAGATGTTTACACAGTTTTGTACAGGAAATCTACGCTTAAAAATATGTATTTT  
ATTCAAGCGGTAACCGCTGTACGAGCAGTGACATTGCTGGTCGCACCTTAAATGTAAACC  
AACGTTACGGCACACCGTGATGTACCCGCATTAAGTTTTGTAAATTCGTTATTACGATT  
ATTGA

1370\_244\_4\_-1

AAGGTATCCATTTCAATTCCTGTTTTCTATCTAGCCAATTCATAATCGTAATAACGAA  
TTTACAAAACTTAATGCGGGTACATCACGGTGTGCCGTAACGTTGGTTTACATTTAAGG  
TGGACCAGCAATGTCACCTGCTCGTACAGCGGTTACCGCTTGAATGAAATACATATTTTA  
AGCGTAGATTTCTGTGACAAAACGTGTAAACATCTAGTAGAAAAATAGACGTAGCTGTC  
ACAA

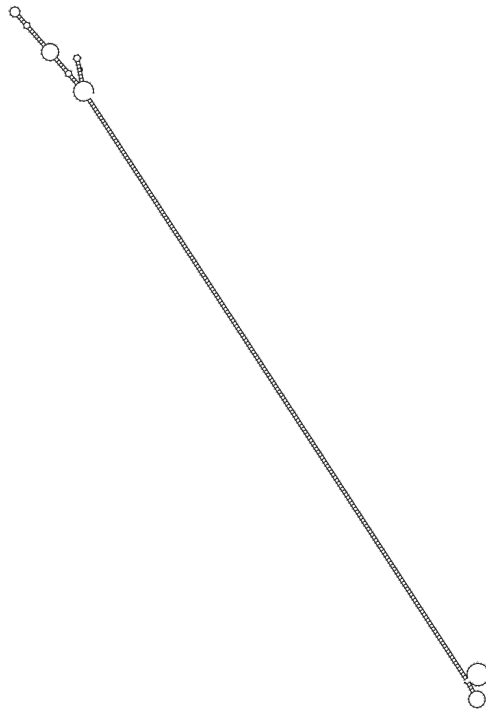

68 1269\_305\_4\_1 ... 5973\_130\_8\_-1

1269\_305\_4\_1

CTATTGACATGGTATCGAAAGGTTGTCCACATTGGGAAGTAACTTGGTTCTATGAATCTT  
CATGTCAGATACGTAGGACAGACTCTTTCCTGTGTAATATTTGTGACAGCTACGTCTAT  
TTTCTACTAGATGTTTACACAGTTTTGTACAGGAAATCTACGCTTAAAATATGTATTTT  
ATTCAAGCGGTAACCGCTGTACGAGCAGTGACATTGCTGGTCGCACCTTAAATGTAAACC  
AACGTTACGGCACACCGTGATGTACCCGCATTAAGTTTTGTAAATTCGTTATTACGATT  
ATTGA

5973\_130\_8\_-1

TGGTTTACATTTAAGGTGCGACCAGCAATGTCCTGCTCGTACAGCGGTTACCGCTTGAA  
TGAAATACATATTTAAGCGTAGATTTCCCTGTGACAAAACGTGTGTAACATCTAGTAGAA  
AATAGACGTA

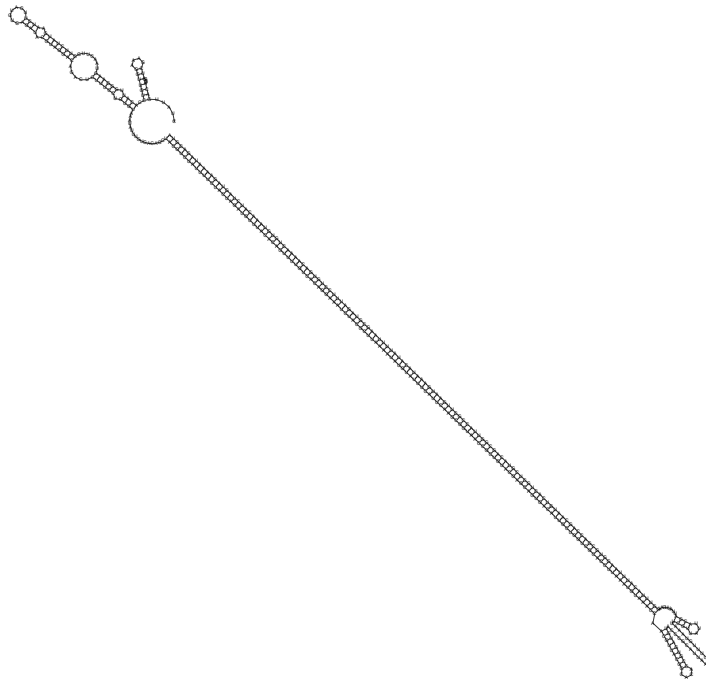

69 60609\_124\_4\_1 ... 60648\_126\_4\_-1

60609\_124\_4\_1

TTATTGACGTTTTTTTTTCTTAGTCTCTTTAATGAAGAAGGAAAAAGAACTAAGTTATT  
ATTAGAAGGAAAAGGAGGAGGGGAGGCGAGAAAAGAATGGTGGAGAATAAATGAAAATCTC  
CAAG

60648\_126\_4\_-1

GTGACATGGTATAATCCATATGTATCGTGCTGAAATTTTTCTTGGAGATTTTCATTTAT  
TCTCCACCATTCTTCTCGCCTCCCCTCCTCTTTTCTTCTAATAATAACTTAGTTCTT  
TTTCCT

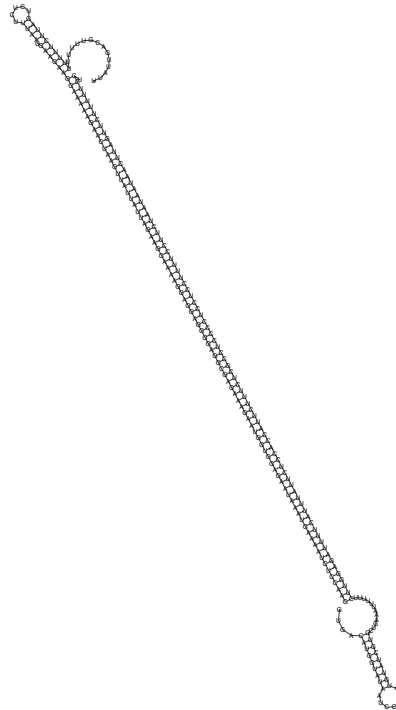

70 1330725\_124\_4\_1 ... 1330771\_121\_4\_-1

1330725\_124\_4\_1

CCAAGCCGATCTATTTTGGATATCTTATTGTCATTTTCAAGTGAAAAAAGGTCTCCCTT  
TCTATACGAGAGTTCTCATATGGAATGAGAGAATAAGCGGTAAGATATCGAACATTCACA  
AGAA

1330771\_121\_4\_-1

GATATTGTATATATTCAATTGCACCTCTTAACTGGTACTTTATTTCTTGTGAATGTTTCA  
TATCTTACCGCTTATTCTCTCATTCCATATGAGAACTCTCGTATAGAAAGGGAGACCTTT  
T

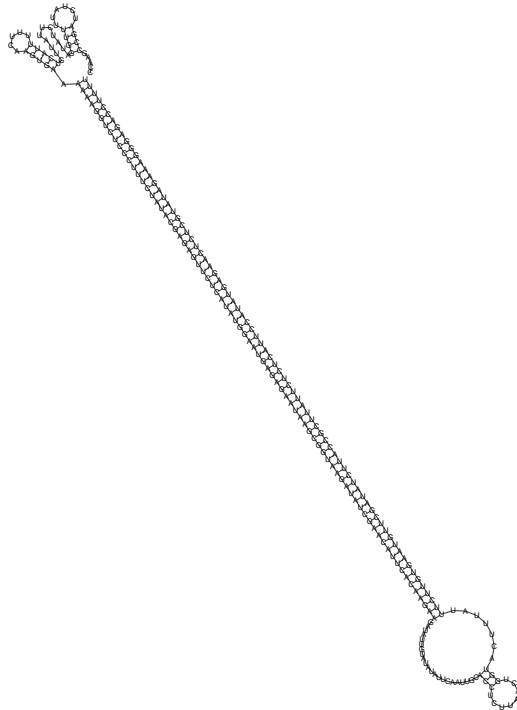

71 1516735\_200\_4\_1 ... 1516529\_286\_4\_-1

1516735\_200\_4\_1

ATAGCAGAATGTGACACAAGCTATACCATAACGTCTCTGATCGACATTCATGTATGGTATC  
GTCTATATCTTGTGCTTAAAGGTAGCGTATAGTAAGGTAATTACTATATGATCAATACTG  
TGTGTGTAGAGTACAATAAAATATATGGGAAGAACATAAAAAAGTTCGTATTGTGACATGT  
TATTGAGGCTATGGTAAGCG

1516529\_286\_4\_-1

TTTAAGCACAAGATATAGACGATACCATACATGAATGTCGATCAGAGACGTATGGTATAG  
CTTGTGTCACATTCTGCTATCGTATATGGTATACATGGCACATACTTTAAATTTTAAAGT  
AATGTCAC TTGATTAAGATCTTCCTATACGTCAAGGTCTCGAGATAAACTTTATGTCT  
CAAATAATACATGCTAGGCATATAATGACCCATTTTCTGGAGTTGATGTACTCAAGACAT  
TGGTTAAATATCAATCACGCATGATGATAGTGCGCCCTATTATAAC

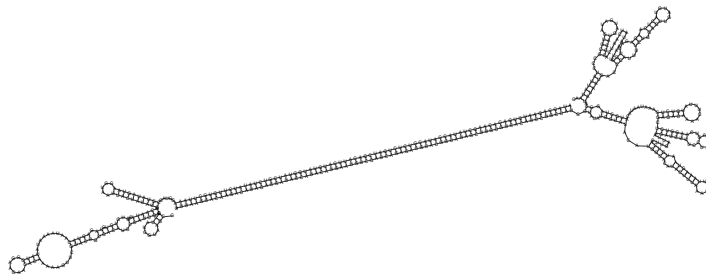

72 1517880\_200\_4\_1 ... 1518000\_200\_4\_-1

1517880\_200\_4\_1

GATATCCGCTCGAGATTAAGTGCGGCCCTCTCCACCCGATAAGGAACAAAGGGCATGCTT  
CCTTTTTTAGCTTTACGCACTATTGTCAAATTGTTTATATAAACAGGCTGATATAGAATT  
CATCCTGAAAACAATGGTAAAGTTTTTCTTATTGCACTTCGCTATCCTAAATTCAGGGTT  
GAGATTTCTTTCTTTTATG

1518000\_200\_4\_-1

TTGCGTTCCTACGTCAAAGAACAATGATGCTACGGAGCGCAAGAAAGTGACGTGGCCAAC  
TATCAGCGCGCTAGGATATGTATGCACTGCCGAAAGGCTGAAGCGTATCGTACATTAATT  
CATAAAGAGAAAGAAATCTCAACCCCTGAATTTAGGATAGCGAAGTGCAATAAGAAAAACT  
TTACCATTGTTTTTCAGGATG

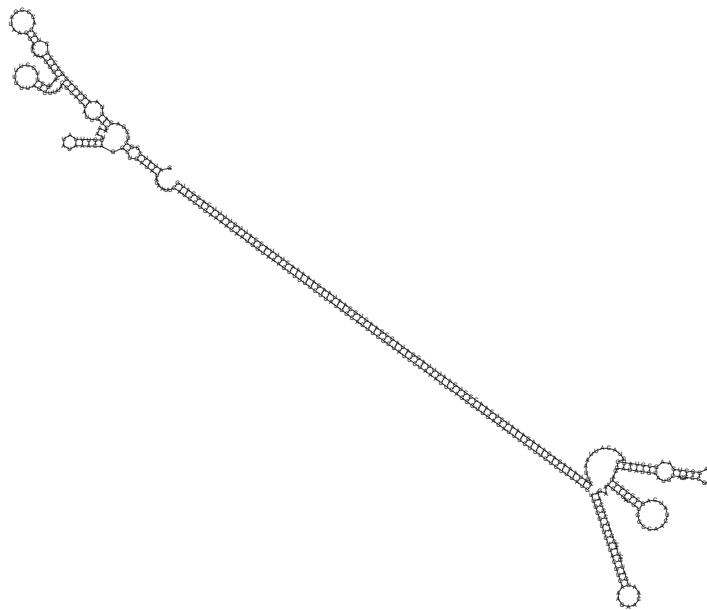



73 77832\_120\_5\_1 ... 77751\_161\_5\_-1

77832\_120\_5\_1

AACTTTTTTCAACCTCGAAGAAAATCGTCGTCCTTCGAAGATTTAGTGGGAATCTTCAA  
GGTGGATAGTTTCCAAATTAATACTGCAGAAGAGGCTTTTAAAACATGCCTGAGGTATAA

77751\_161\_5\_-1

TAATTTGGAAACTATCCACCTTGAAGATCCCACTAAATCTTCGAAGGACGACGATTTTC  
TTCGAGGTTGAAAAAAGTTTTCAAGAATTTTCGCGCTTCTCCTAATCGGGAATTTATC  
TGTCATAATTATAATTCCTATTTGGAATTGGAACGAAAT

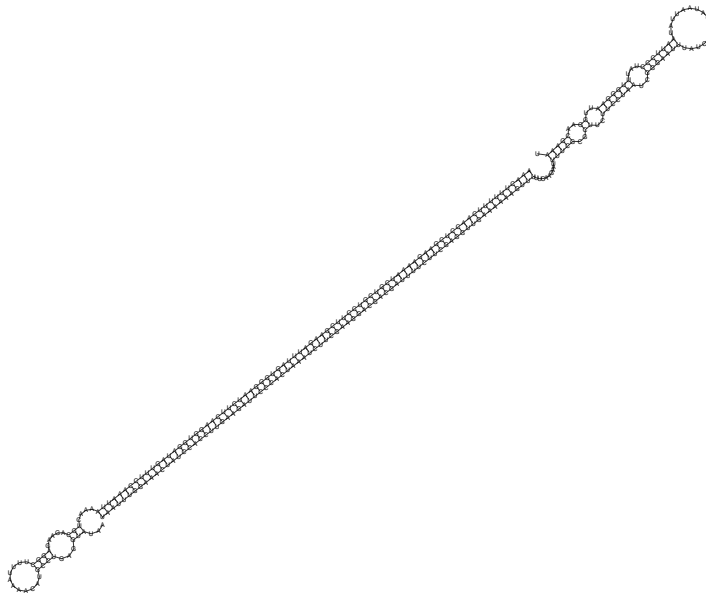

74 322006\_121\_5\_1 ... 322046\_121\_5\_-1

322006\_121\_5\_1

TAAAAAGCGTTGCGTGATGTTTGGGTGCAATTGGCGGAAAAGCGGAAC TTTCAAATTTAC  
GATAGGTGGAGATACATCTCCACCTTTCTCCCATTATCTTTGAATTTCTCAAATATA  
T

322046\_121\_5\_-1

GATTAAACAATGGCATTCTATGGATTTGTTGTTCTTTATATATTTGAGGAAAATTCA  
AAGATAATGGGGAGAAAGGTGGAGATGTATCTCCACCTATCGTAAATTTGAAAGTCCGC  
T

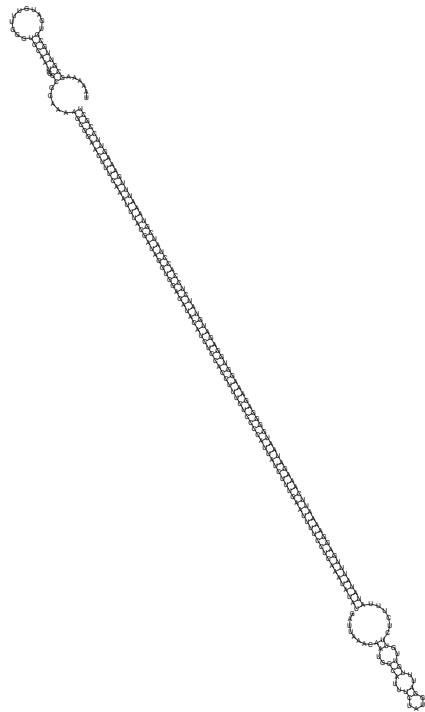

75 559126\_122\_5\_1...559168\_200\_5\_-1

559126\_122\_5\_1

ATGCGATTGTCGTGTAATGGTATCGCGCATACTGAAGGTTTCAGCCCTGTTTTGATGTGC  
CGCGGCAAAGTGGTTTTTCTCCATACAGGATGAAGTGTTCCTTCCCATGCCGCGGCAA  
GC

559168\_200\_5\_-1

CAAGAGACTATACATCCCACAATTGATTCGGTAGGTGCTTTTATACTGATTCATTTGAGG  
TCTTGGCATTGTCAATTGAAGTACATTTAGTTGAAAAGTTGAGATTTATTTAGGATGA  
GCTTGCCGCGCATGGGAAAGAAACACTTCATCCTGTATGGAGAAAAACCACTTTGCCG  
CGGCACATCAAAACAGGGCT

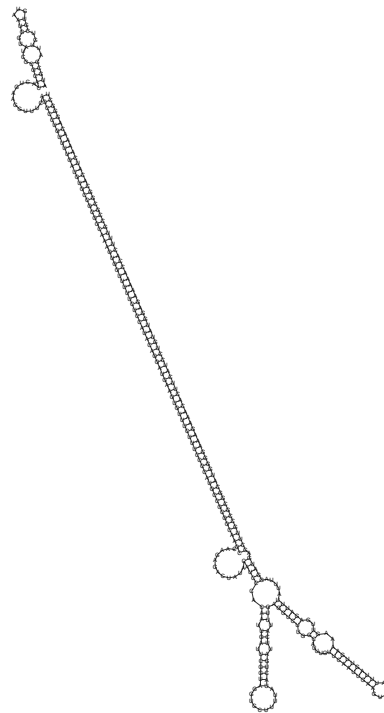

76 255408\_119\_6\_1...255367\_120\_6\_-1

255408\_119\_6\_1

TTTTCTTTTGGTTGGTTTTTGGCAACCAGAGTATTTTTCTGGTTGCTCCAGTAAGGTATTT  
CGCTATCTTCCAACAAACGGGGCACACGTGCGGGAGTTCAAAGGGGCAGAATAGTGGG

255367\_120\_6\_-1

CGTTTGTGGAAGATAGCGAAATACCTTACTGGAGCAACCAGGAAAAATACTCTGGTTGC  
AAAAACCAACAAAAGAAAAAATGGAAGACCTAAGA ACTATGCATTTTTTTTTTAAGGGTT

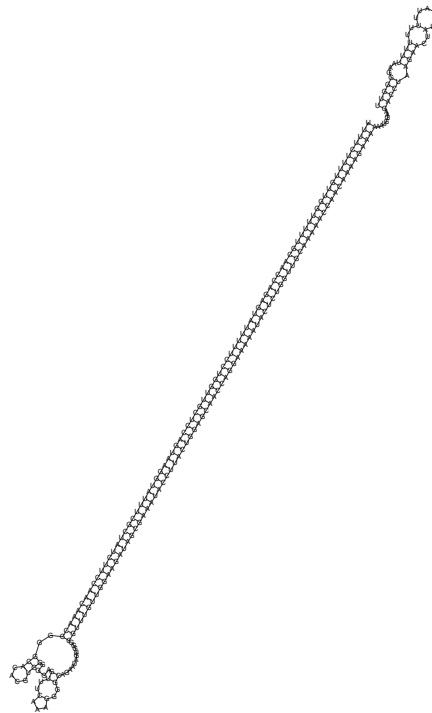

77 268349\_431\_6\_1...268591\_148\_6\_-1

268349\_431\_6\_1

GATTTCTTCTCGAGTCATATATACTATTACATGAGTTCGAGTATGGTGTGTTTTCTTTA  
GAATGTCTTATCAAGACCGACAATTCATACAGGTCGAGATATGTAAAGTCTACATGCCGA  
GCTAGGATGAGAAAAAAGTATACAAATTGCAGGCAAATAAACACACCAAAAGATACTAA  
AAAAATCTTTTAAAGTTTTGGTTAGTTATTGGGGATCATCATGCATTTAACGACAACAGA  
GAAAAGAAAAACAAAAAACAATACAATGTAAAAAGCAGTACTATGTAGGAATAAATC  
CTGCCTCAATTGCAGAAAAAAGGTATGCGTAATCTAAATAAGATACTATGTATTGAT  
ATTCATATCACTAACTTCTCTCAGATCAAATATGATTTAAAGGAGCGATTTCTGGACTG  
TACAAAAAAA

268591\_148\_6\_-1

TTGATCTGAGAGAAGTTAGTGATATGAAATATCAATACATAGTATCTTATTTAGATTACG  
CATACCTTTTTTTTTCTGCAATTGAGGCAGGATTTATTCCTACATAGTACTGCTTTTTAC  
ATTGTATTGTTTTTTTTGTTTTCTTT

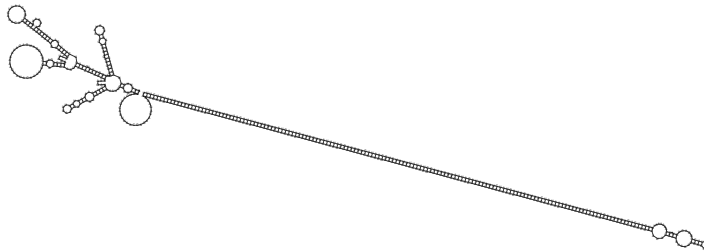

78 17016\_121\_7\_1 ... 16965\_130\_7\_-1

17016\_121\_7\_1

ACCTTGAAGTATATATATATATTTAATAATAAATACATTATTGGAATGGCTAGTAAATTTTG  
ACATAAACATGATTTCCGAACGAATTAATAACAGTTGATTTAGGAGAAAGTATCAGTAC  
A

16965\_130\_7\_-1

TCGAAAATCATGTTTATGTCAAAATTTACTAGCCATTCCAATAATGTATTTATTATTA  
TATATATATACTCAAGGCTGATGGGGTGCTGTAGCATTTCGATGTAGCGATAGCAA  
TTGAAAATAA

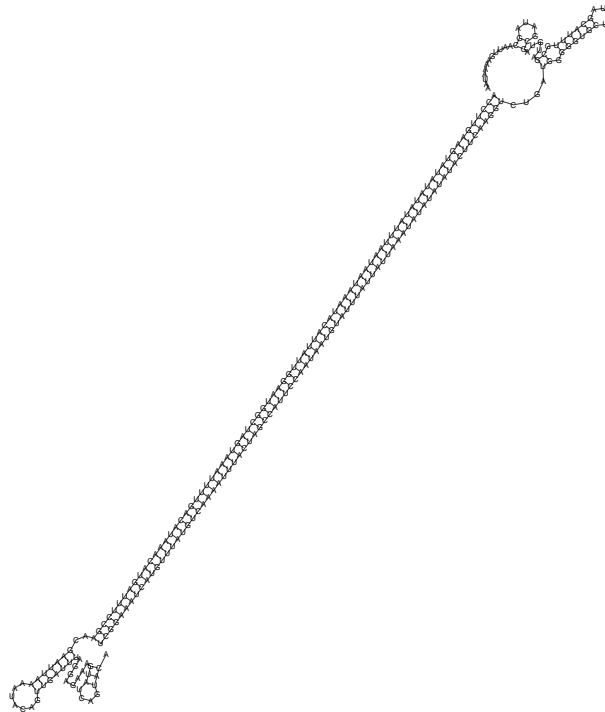

79 166622\_123\_7\_1...166663\_122\_7\_-1

166622\_123\_7\_1

TGTATGCCCTTTTCATGTATAAAAAGAAGGGTAATTTAAAAAAGTTTATAATCATCCAGAT  
TCCTTATTTTTTTCTTCTTTCGCCAGGTGTTTTACCCAGCTAAGACTAACCTTGTGGTT  
CAG

166663\_122\_7\_-1

ATTCAGAATTGTAATATCGGACGGCAATACTAGTGTAATCTGAACCACAAGGTTAGTCT  
TAGCTGGGTAAAACACCTGGCGAAAAGAAGAAAAAATAAGGAATCTGGATGATTATAAA  
CT

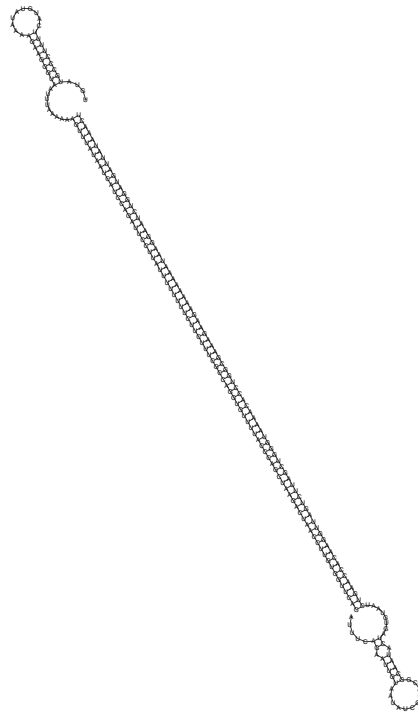

80 272298\_67\_7\_1 ... 272298\_67\_7\_1

272298\_67\_7\_1

ATATATATATATATATATATATGTTTGTATGTATATATATATACGTATATATATCATA  
TATACGA

272298\_67\_7\_1

ATATATATATATATATATATATGTTTGTATGTATATATATATACGTATATATATCATA  
TATACGA

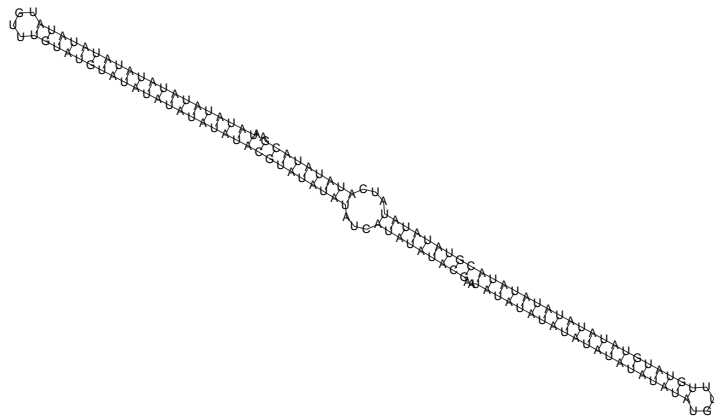



81 272298\_67\_7\_1 ... 464799\_78\_11\_1

272298\_67\_7\_1

ATATATATATATATATATATATGTTTGTATGTATATATATATATACGTATATATATCATA  
TATACGA

464799\_78\_11\_1

TCTTGCCGACGGCTACGTATATATATATATATATAAATATATATATATATATTCATGT  
ATACTGTATATGTACAAT

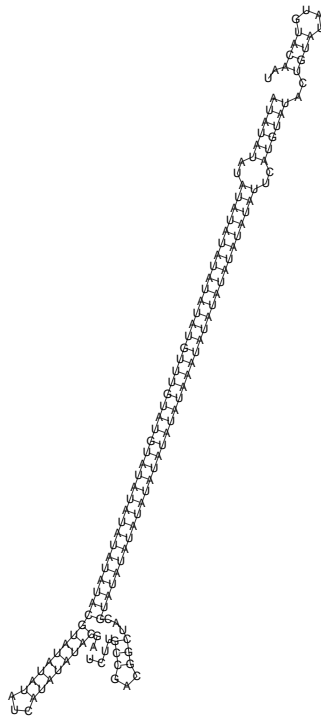

82 884226\_119\_7\_1...884266\_119\_7\_-1

884226\_119\_7\_1

AATATTTTGGTGCTGGGATTCTTTTTTTTTCTGGATGCCAGCTTAAAAAGCGGGCTCCAT  
TATATTTAGTGGATGCCAGGAATAAACTGTTCAACCAGACACCTACGATGTTATATATT

884266\_119\_7\_-1

GTAACCCGTACATGCCAAAATAGGGGCGGGTTACACAGAATATATAACATCGTAGGTG  
TCTGGGTGAACAGTTTATTCTGGCATCCACTAAATATAATGGAGCCCGCTTTTAAAGC

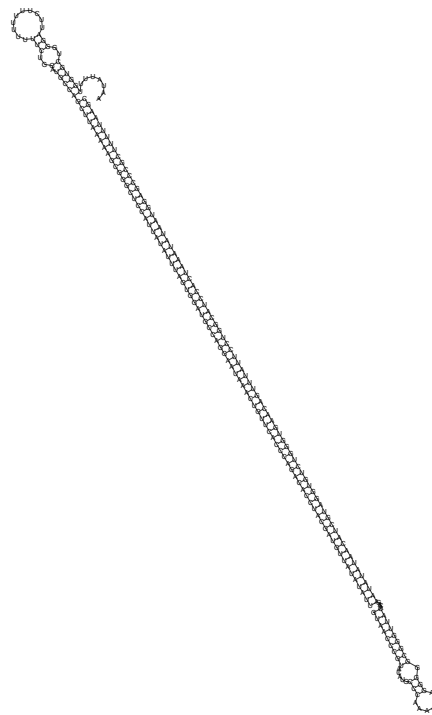

83 50743\_119\_8\_1 ... 50784\_119\_8\_-1

50743\_119\_8\_1

AATAATCTAAATACCGGTTTCGTGCGAGACATTCTCTGTGATTCACAGATTACGGCGCAG  
AAAATAAAATAGCCGTCCAGCTCGGAGTTTCTAAAATTACGTCCGAGATGACGGAGGCT

50784\_119\_8\_-1

TCGTAGATTGGCATCCCTCACCCGTCTGAAATGATTTTATAAGCCTCCGTCATCTCGGAC  
GTAATTTTAGAACTCCGAGCTGGACGGCTATTTTATTTTCTGCGCCGTAATCTGTGAA

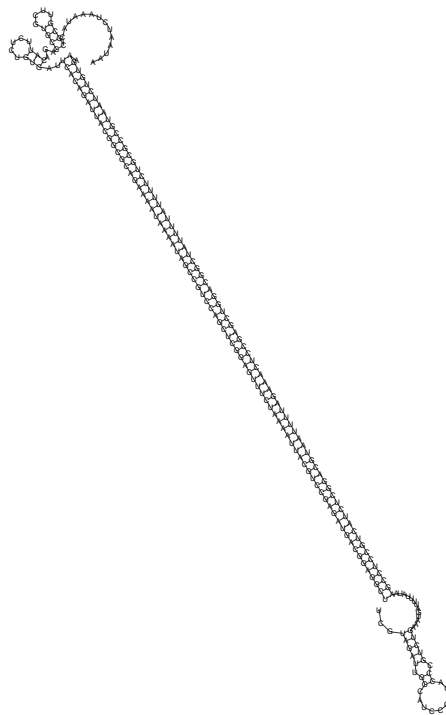

84 236597\_120\_8\_1 ... 236637\_122\_8\_-1

236597\_120\_8\_1

TAAAAGTATTTTAGTTTGTGTTGTAATTCGTCTTTTCTCTCACTACCGTAACAACGTG  
GTAGTTGGCAGAATATATATATTCTTGGCAACCTAGTTGTTACTCAAATAGAAGAAAAAG

236637\_122\_8\_-1

TGCGAGTGAATAGGGAGAACCAAATAAATAGGGAGAACTTGCTTTTCTTCTATTTGAG  
TAACAACCTAGGTTGCCAAGAATATATATATTCTGCCAACTACCACGTTGTTACGGTAGTG  
AG

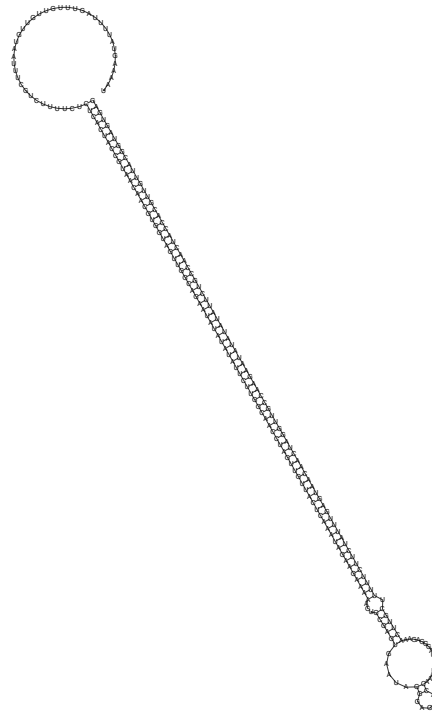

85 319950\_120\_8\_1 ... 319990\_120\_8\_-1

319950\_120\_8\_1

CAAGGTTAGCGCTTTACGGACTTTATTGCTATTCTAGTTCAAAGAAAGCAAATGGCGCAG  
TTACCAAACCTCGCCATTTGTTTTTCCGTTATTTTTTCTTATAAACGCGCCTAGAA

319990\_120\_8\_-1

TTAGCGCTTTCTCAGGATTTGCGCTTCGCACGGTTTTTCTTCTAGGCGGTTTATAAGA  
AGAAAAATAACGAAAAAACAAATGGCGAGGTTTGGTAACTGCGCCATTTGCTTCTTT

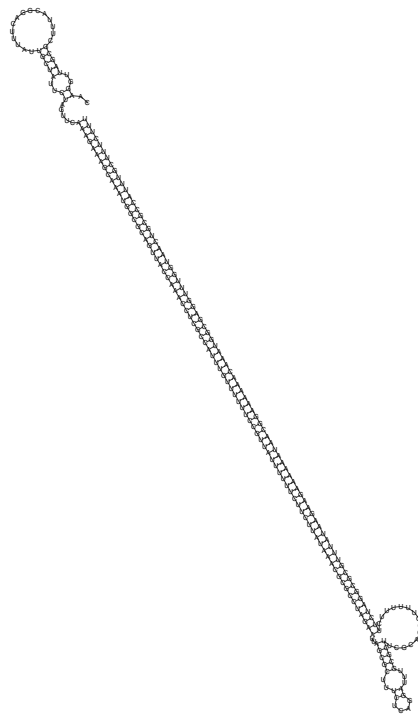

86 117720\_237\_9\_1...117760\_117\_9\_-1

117720\_237\_9\_1

GCCAGCTATATTTCCATATTCCTTAGTTAAAGCTCATCGCAAATTTTTCAAAGAGCATT  
AGGGTCACGTGTATACATTACGTGACTATCTAGTACCCGCCCGTGGCAAAAAAAGAAG  
ACACCAATTTGGCACTGAGAAAAGAAAAGTTTATCAATAACGAAAACGAACTTAAGAG  
GAAAAAGAGTATAGAGAAAACAAAGGCAATCAGCGGCTAATTTGGTGAAATAACA

117760\_117\_9\_-1

TGATAAACTTTTTCTTTCTCAGTGCCAAATTGGTGTCTTCTTTTTTGGCACGGGGCGG  
GTA TAGATAGTCACGTGAATGTATACACGTGACCCTAATGCTCTTTGAAAAATTTT

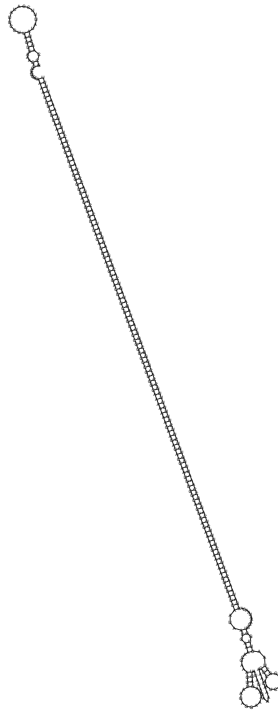

87 12506\_86\_0\_1 ... 32419\_121\_0\_1

12506\_86\_0\_1

TATAGTGGTGGGGTCCCAATTATTATTTTCAATAATAATTTATCATGGGACCCGGATATC  
TTCTTGTTTTTATTATTATTTTATT

32419\_121\_0\_1

AATAAAATAATAAATGATAACAAGAAGATATCCGGGTCCCAATAATAATTATTATTGAA  
AATAAATAATTGGGACCCATATAGAATATAAATAATTAATATATATATATAAATAATAA  
T

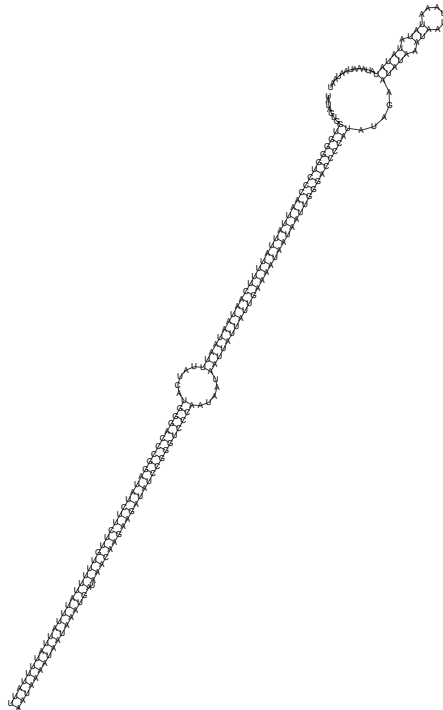

88 12506\_86\_0\_1 ... 45142\_123\_0\_1

12506\_86\_0\_1

TATAGTGGTGGGGTCCCAATTATTATTTTCAATAATAATTTATCATGGGACCCGGATATC  
TTCTTGTTTTTATTATTATTTTATT

45142\_123\_0\_1

TAAATAATATAATAAATGATAAACAAGAAGATATCCGGGTCCCAATAATAATTATTATTG  
AAAATAATAATTGGGACCCCATCTAAAATATATATATAACTAATAATATATTATATATA  
TTA

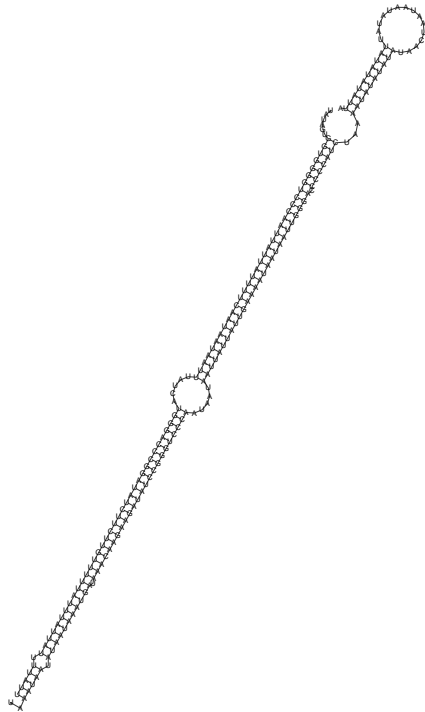



89 29726\_260\_0\_1 ... 29783\_136\_0\_-1

29726\_260\_0\_1

TATAGTATTAATAAAAAAAAAATAAAATATTTAATAAAATATTATTATTAATAATATTTATTAATA  
ATAATATAACATAATAAAATATAAGATTATTATATAATATATTTATTATATCATATAGTTC  
CGGGGCCCGCCACGGGAGCCGGAACCCGGAAGGAGAAATTATAACATATTTTAAATA  
ATATTCATATTTATTTTATATACAAATAAATATATTTATTTAGAATAATAAAAAAAAAATA  
ATAAATAAATATATTATTAT

29783\_136\_0\_-1

TAAATATGAATATTATTAATAAAATATGTTATAATTTCTCCTTCCGGGGTCCGGCTCCCG  
TGGCCGGGCCCGGAACCTATATGATATAATAAATATATTATATAATAATCCTTATATTTAT  
TATGTTATATTATTTT

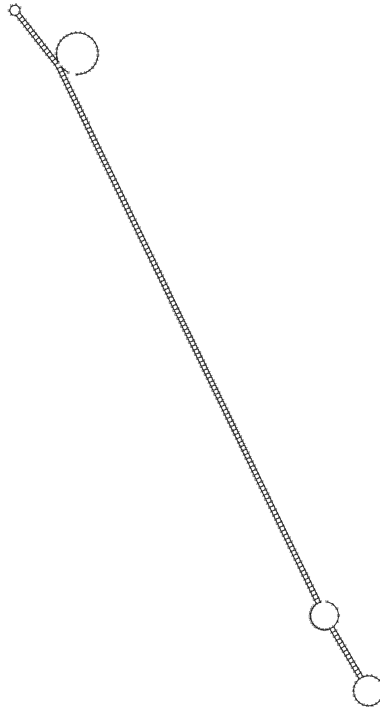



91 32419\_121\_0\_1 ... 12506\_86\_0\_1

32419\_121\_0\_1

AATAAAATAATAAATGATAACAAGAAGATATCCGGGTCCAATAATAATTATTATTGAA  
AATAATAATTGGGACCCATATAGAATATAAATAATTAATATATATATAAATAATAA  
T

12506\_86\_0\_1

TATAGTGGTGGGGTCCAATTATTATTTCAATAATAATTTATCATGGGACCCGGATATC  
TTCTTGTTTTTATTATTATTTATT

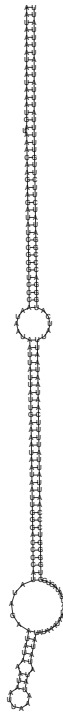

92 32419\_121\_0\_1 ... 30507\_136\_0\_-1

32419\_121\_0\_1

AATAAAATAATAATGATAACAAGAAGATATCCGGGTCCAATAATAATTATTATTGAA  
AATAATAATTGGGACCCATATAGAATATAAATAATTAATATATATATAAATAATAA  
T

30507\_136\_0\_-1

TATTTCTATTTTATATACATTATTATTATATTAATTAATATGATATTATAATGGTGGGG  
GTCCAATTATTATTGAAAATAATAATTATTAATGGGACCCAGATATCTTCTTGTAAT  
CATTATTATTTTATT

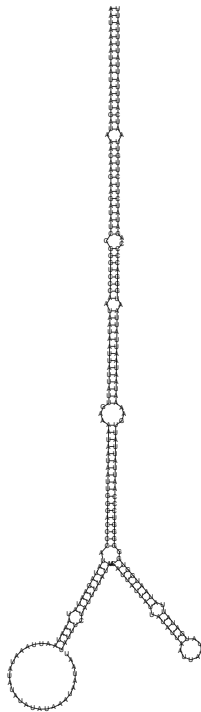

93 32419\_121\_0\_1 ... 54498\_123\_0\_1

32419\_121\_0\_1

AATAAAATAATAAATGATAACAAGAAGATATCCGGGTCCAATAATAATTATTATTGAA  
AATAATAATTGGGACCCCATATAGAATATAAATAATTAATATATATATAAATAATAA  
T

54498\_123\_0\_1

ATTAATAATATATATATTATTTTATATATTTTATTTAATATAAATTATTTATTTTTAT  
ATTTTATTATGAGGGGGGTCCAATTATTATTTTCAATAATAATTTATCATGGGACCCG  
GAT

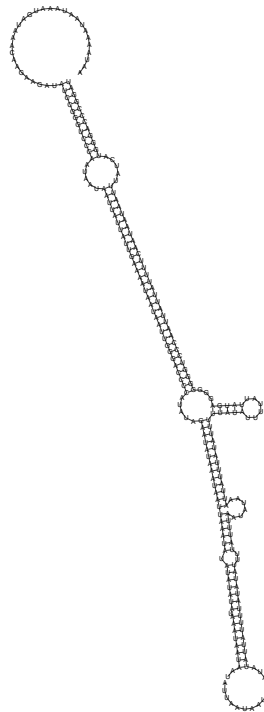

94 45142\_123\_0\_1 ... 12506\_86\_0\_1

45142\_123\_0\_1

TAAATAATATAATAAATGATAAAACAAGAAGATATCCGGGTCCAATAATAATTATTATTG  
AAAATAATAATTGGGACCCCATCTAAAATATATATATAACTAATAATATATTATATATA  
TTA

12506\_86\_0\_1

TATAGTGGTGGGGTCCAATTATTATTTCAATAATAATTTATCATGGGACCCGGATATC  
TTCTTGTTTTTATTATTATTTTATT

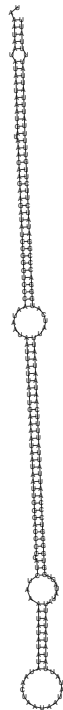

95 45142\_123\_0\_1 ... 30507\_136\_0\_-1

45142\_123\_0\_1

TAAATAATATAATAAATGATAAACAAGAAGATATCCGGGTCCAATAATAATTATTATTG  
AAAATAATAATTGGGACCCCATCTAAAATATATATATAACTAATAATATATTATATATA  
TTA

30507\_136\_0\_-1

TATTTCTATTTTATATACATTATTATTATATTAATTAATATGATATTATAATGGTGGGG  
GTCCAATTATTATTGAAAATAATAATTATTAATGGGACCCAGATATCTTCTTGTTAAT  
CATTATTATTTTATT

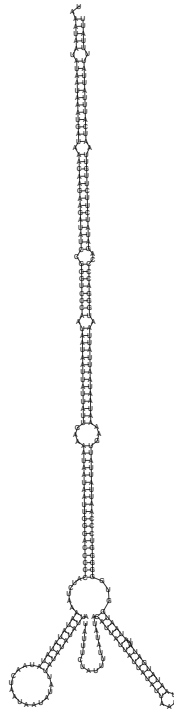

96 45142\_123\_0\_1 ... 54498\_123\_0\_1

45142\_123\_0\_1

TAAATAATATAATAAATGATAAACAAGAAGATATCCGGGTCCAATAATAATTATTATTG  
AAAATAATAATTGGGACCCCATCTAAAATATATATATAACTAATAATATATTATATATA  
TTA

54498\_123\_0\_1

ATTAATAATATATATATTATTTTATATATTTTATTTAATATAAATTATTTATTTTTAT  
ATTTTATTATGAGGGGGGTCCAATTATTATTTTCAATAATAATTTATCATGGGACCCG  
GAT

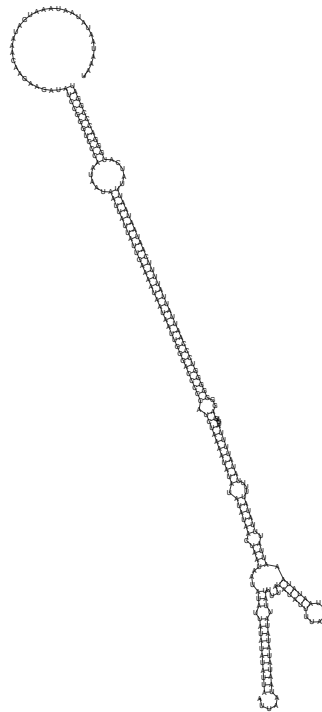



97 54498\_123\_0\_1 ... 32419\_121\_0\_1

54498\_123\_0\_1

ATTAATAATATATATATATTATTTTATATATTTTATTTAATATAAATTATTTATATTTTAT  
ATTTTATTATGAGGGGGGTCCCAATTATTATTTTCAATAATAATTATCATGGGACCCG  
GAT

32419\_121\_0\_1

AATAAAATAATAAATGATAACAAGAAGATATCCGGTCCCAATAAATAATTATTATTGAA  
AATAAATAATTGGGACCCATATAGAATATAAATAATTAATATATATATAAATAATAA  
T

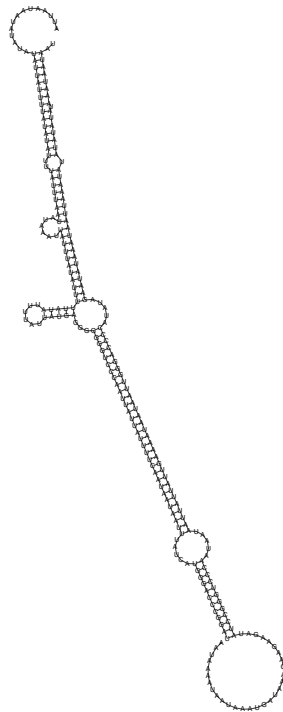

98 54498\_123\_0\_1 ... 45142\_123\_0\_1

54498\_123\_0\_1

ATTAATAATATATATATATTATTTTATATATTTTATTTAATATAAAATTATTTATATTTTAT  
ATTTTATTATGAGGGGGGTCCCAATTATTATTTTCAATAATAAATTATCATGGGACCCG  
GAT

45142\_123\_0\_1

TAAATAATATAATAAATGATAAACAAGAAGATATCCGGGTCCCAATAATAATTATTATTG  
AAAATAAATAATTGGGACCCCATCTAAAATATATATATAACTAATAATATATTATATATA  
TTA

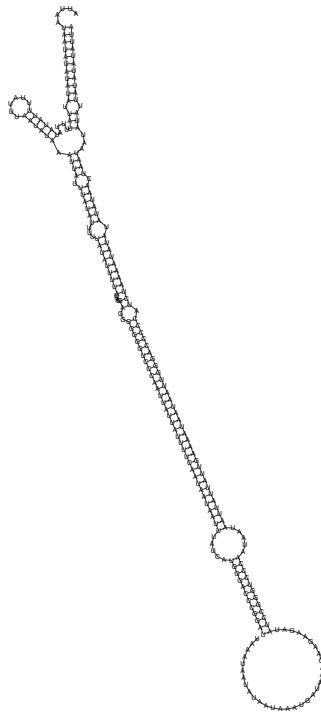

99 62832\_137\_0\_1 ... 34913\_97\_0\_-1

62832\_137\_0\_1

ATATATTATTAATTTAATAATTATTATAATAGTTCCGGGGCCCGGCCACGGGAGCCGGAA  
CCCCGAAAGGAGTTTATAAAAGATATATTTTTATATTATATTATATTATTTAATAAAT  
ATTACCTTTTTTTATTA

34913\_97\_0\_-1

TTTATTAATATAATTTATATATTTATCTTATTCTCCTTTCGGGGTTCCGGCTCCCGTGG  
CCGGCCCCGGAAC TATTAATATATAAATTGAATTAT

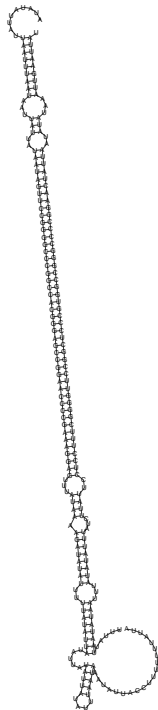

100 62832\_137\_0\_1...29783\_136\_0\_-1

62832\_137\_0\_1

ATATATTATTAATTTAATAATTATTATAATAGTTCCGGGGCCCGCCACGGGAGCCGAA  
CCCCGAAAGGAGTTTATAAAAGATATATTTTTATATTATATTATATTATTTAATAAAT  
ATTACCTTTTTTTATTA

29783\_136\_0\_-1

TAAATATGAATATTATTAATAAATATGTTATAATTTCTCCTTCCGGGGTCCGGCTCCCG  
TGGCCGGCCCCGGAACATATGATATAATAAATATATTATATAATAATCTTATATTTAT  
TATGTTATATTATTTT

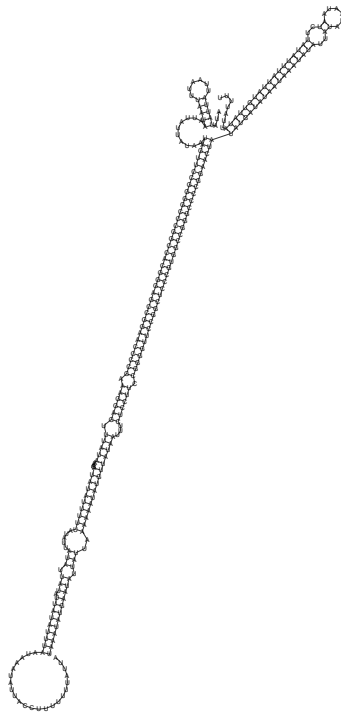

101 62832\_137\_0\_1...2096\_297\_0\_-1

62832\_137\_0\_1

ATATATTATTAATTTAATAATTATTATAATAGTTCCGGGGCCCGCCACGGGAGCCGGAA  
CCCCGAAAGGAGTTTATAAAAGATATATTTTATATTATATTATATTATTTAATAAAT  
ATTACCTTTTTTTATTA

2096\_297\_0\_-1

TCTATAAAGAAATGAGATTAGATGATATTGAAATGAAATAAAATGAGATGAGATGAATTG  
GGCCCGGAAAGGACCGAACCCTCATAATAATTAATTAATATAATTATAATAAAAC  
TTATTATATATTTTTATATATATATATATTTTTTTTATATATTATATAATAAATAT  
TACTTCTTATTAATAATTCCTTATTTTTATTATTTTTAATAATTAATTCATATAGTTATT  
ATAATATATAGATAAACTCCTTTCGGGGTTCGGCTCCCGTGGCCGGCCCCGGAAC

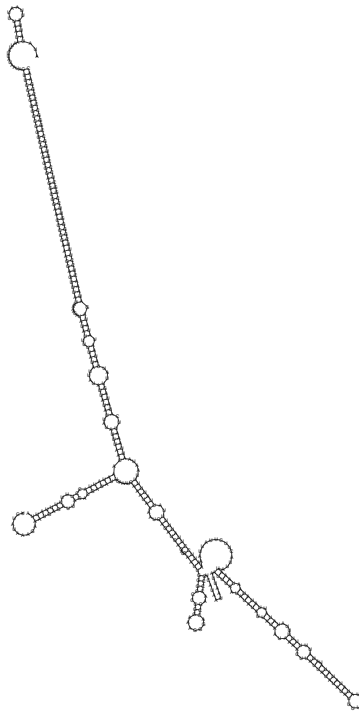

102 76206\_186\_0\_1...29783\_136\_0\_-1

76206\_186\_0\_1

TATATTTATAAAAATATTAATATTTTATTTAAAATAAATAATGATTAATTTATAAAAATAT  
ATATTAATTAAGTTTCGGGTCCCGGCTACGGGACCCGGAACCCCGAGAGGAGTTATTAT  
ATTTATAATTAATCTTTAAATAATATATCTTAAATTATTATATTGATATTAATATTATA  
TTGATA

29783\_136\_0\_-1

TAAATATGAATATTATTAAAAAATATGTTATAATTTCTCCTTCCGGGGTTCCGGCTCCCG  
TGGCCGGGCCCCGGAACATATGATATAATAAATATATTATATAATAATCTTATATTTAT  
TATGTTATATTATTTT

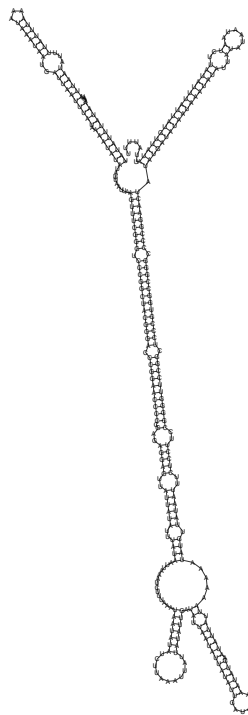

Supplement: 1741-7007-5-25-S10.pdf [file 1741-7007-5-25-S10.pdf]
