# Supplementary material for: Comparative analysis of structured RNAs in S. cerevisiae indicates a multitude of different functions
Source: PubMed Central journal article supplement (PMC1914338; doi:10.1186/1741-7007-5-25), 2007-06-18

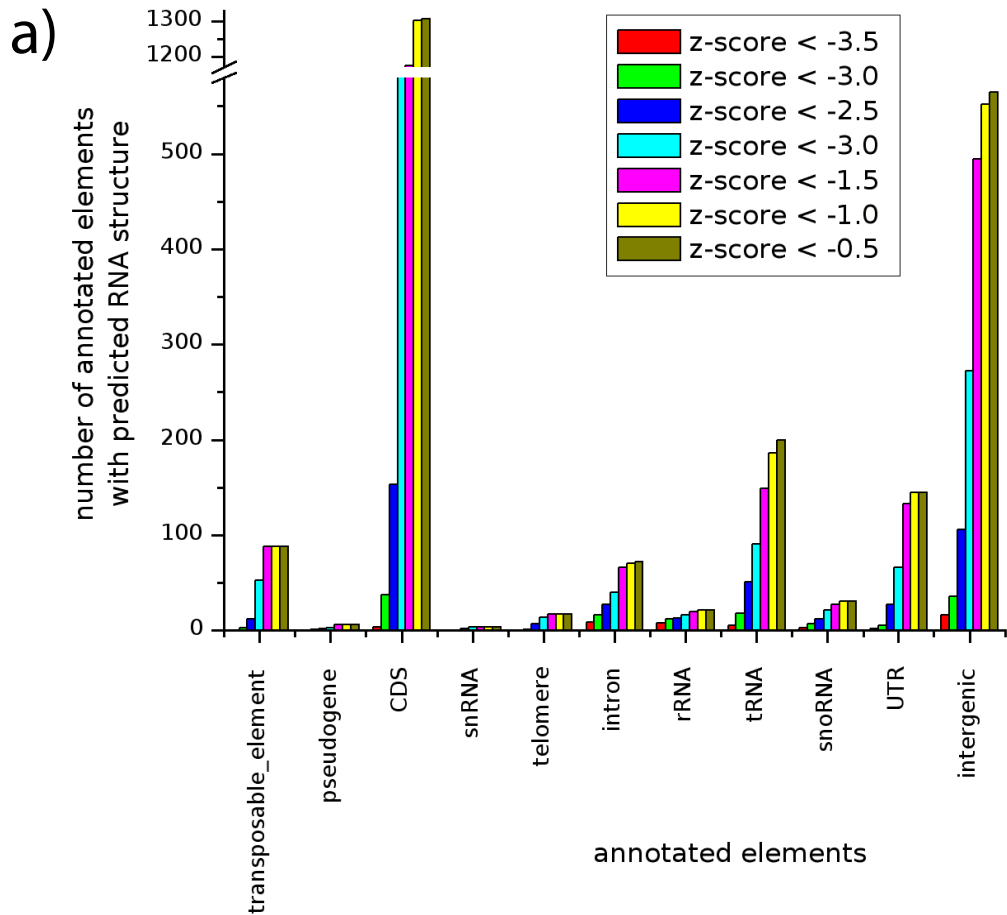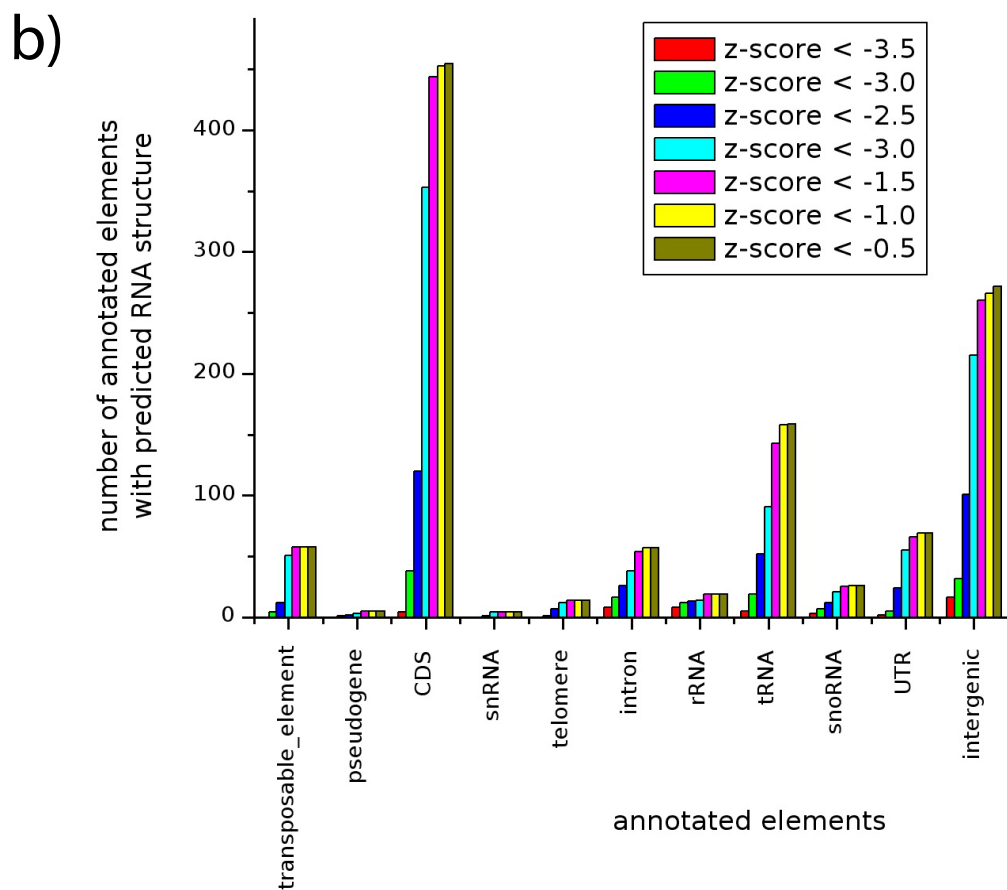

Supplement: 1741-7007-5-25-S2.pdf [file 1741-7007-5-25-S2.pdf]
