# Supplementary material for: Comparative analysis of structured RNAs in S. cerevisiae indicates a multitude of different functions
Source: PubMed Central journal article supplement (PMC1914338; doi:10.1186/1741-7007-5-25), 2007-06-18
Supplement: 1741-7007-5-25-S3.pdf [file 1741-7007-5-25-S3.pdf]

**Additional file 3 — Known RNA genes in the yeast genome, covered by predicted RNA structures**

Known RNA genes in the yeast genome, covered by predicted RNA structures. The annotation was taken from the *Saccharomyces Genome Database*. Structured elements with reported  $P_{SVM}^*$ -values larger than 0.5 and 0.9, resp., are shown.  $S_E$  denotes the sensitivity to detect functional classes of known RNAs, **ali** refers to the number of elements in the input alignments, mpi is the mean percent identity of the windows.

| <b>Feature class</b> | $P_{SVM}^{*0.5}$ | $P_{SVM}^{*0.9}$ | <b>ali</b> | $S_E$ | <b>SGD</b> | <b>mpi</b> |
|----------------------|------------------|------------------|------------|-------|------------|------------|
| snoRNA               | 32               | 26               | 68         | 0.47  | 68         | 74%        |
| tRNAs                | 200              | 159              | 274        | 0.72  | 299        | 85%        |
| rRNA                 | 21               | 19               | 27         | 0.78  | 27         | 94%        |
| snRNA                | 4                | 4                | 6          | 0.66  | 6          | 78%        |
| CDS                  | 1309             | 455              | 6651       | 0.20  | 7050       | 79%        |
| pseudogene           | 6                | 5                | 22         | 0.32  | 22         | 81%        |
| introns              | 72               | 57               | 332        | 0.22  | 365        | 82%        |
| transposons          | 50               | 50               | 50         | 1.00  | 50         | 78%        |
| telomere region      | 17               | 14               | 22         | 0.77  | 32         | 84%        |
