# Supplementary material for: Comparative analysis of structured RNAs in S. cerevisiae indicates a multitude of different functions
Source: PubMed Central journal article supplement (PMC1914338; doi:10.1186/1741-7007-5-25), 2007-06-18
Supplement: 1741-7007-5-25-S8.pdf [file 1741-7007-5-25-S8.pdf]

## Additional file 8 — Structured RNAs providing evidence for snoRNAs

Structured RNAs providing evidence for snoRNAs. The scores are given as reported by *snoSCAN* for C/D-box snoRNAs and *snoGPS* for H/ACA snoRNAs. The score-cutoff, as reported by the individual predictions tools, was defined by analysis of all known snoRNAs from yeast. We used the minimal reported score as cutoff (1 stem *snoGPS* = 14; 2 stem *snoGPS* = 21; *snoSCAN* = 14). RNA elements, that were positively predicted by both, the 1 and 2 stem scanner mode of *snoGPS* are given in bold face.

| element id                           | score | start-end of predicted snoRNA | target modification site | additional snoRNA which targets the same site |
|--------------------------------------|-------|-------------------------------|--------------------------|-----------------------------------------------|
| <b>H/ACA snoRNAs, 1 stem scanner</b> |       |                               |                          |                                               |
| 307255_121_2_-1                      | 34.62 | 44-106                        | Cmpl: SSU.U766           | Nd                                            |
| 296839_124_16_-1                     | 22.96 | 14-76                         | Cmpl: SSU.U211           | Nd                                            |
| 308828_138_3_-1                      | 22.31 | 59-120                        | Cmpl: LSU.U2876          | snR34b-E                                      |
| 426518_246_15_-1                     | 22.15 | 42-117                        | Cmpl: LSU.U1003          | snR5b-E                                       |
| <b>1517880_200_4_1</b>               | 20.40 | 23-173                        | Cmpl: SSU.U1289          | Nd                                            |
| 163190_121_3_-1                      | 20.16 | 0-120                         | Cmpl: LSU.U2730          | snR189b-E                                     |
| 296839_124_16_-1                     | 20.01 | 14-76                         | Cmpl: LSU.U959           | snR8a-E                                       |
| 931301_202_15_1                      | 20.01 | 74-191                        | Cmpl: SSU.U120           | Nd                                            |
| 296839_124_16_-1                     | 19.68 | 4-76                          | Cmpl: LSU.U989           | snR49-P                                       |
| 76850_126_12_1                       | 19.67 | 36-120                        | Cmpl: LSU.U1051          | Nd                                            |
| 220972_280_13_1                      | 19.58 | 67-214                        | Cmpl: SSU.U1414          | Nd                                            |
| 101133_361_13_-1                     | 19.53 | 251-329                       | Cmpl: LSU.U2190          | snR32-E                                       |
| 118914_157_10_1                      | 19.53 | 57-141                        | Cmpl: LSU.U2257          | Nd                                            |
| 76206_186_0_1                        | 19.43 | 58-129                        | Cmpl: LSU.U2265          | Nd                                            |
| 763744_120_14_1                      | 19.10 | 26-97                         | Cmpl: LSU.U2128          | snR11b-P                                      |
| 500842_161_13_1                      | 18.80 | 20-110                        | Cmpl: SSU.U632           | RNA161                                        |
| 203336_110_8_-1                      | 18.79 | 14-91                         | Cmpl: LSU.U2822          | snR34a-E                                      |
| 559168_200_5_-1                      | 18.69 | 68-143                        | Cmpl: SSU.U1179          | Nd                                            |
| 255367_120_6_-1                      | 18.22 | 14-97                         | Cmpl: LSU.U1123          | snR5a-E                                       |
| 559168_200_5_-1                      | 17.87 | 19-108                        | Cmpl: LSU.U2348          | Nd                                            |
| <b>14909_343_4_-1</b>                | 17.81 | 31-176                        | Cmpl: LSU.U775           | Nd                                            |
| 797761_210_16_1                      | 17.75 | 39-170                        | Cmpl: LSU.U2940          | snR37-E                                       |
| 9332_206_13_-1                       | 17.72 | 100-204                       | Cmpl: LSU.U1041          | snR33-E                                       |
| <b>234368_239_4_-1</b>               | 17.69 | 3-93                          | Cmpl: SSU.U1000          | snR31-E                                       |
| 987439_120_7_1                       | 17.47 | 2-84                          | Cmpl: SSU.U302           | Nd                                            |
| <b>14909_343_4_-1</b>                | 17.36 | 70-130                        | Cmpl: SSU.U106           | snR44a-P                                      |
| 264236_127_4_1                       | 17.19 | 32-92                         | Cmpl: LSU.U2339          | snR9-E                                        |
| 78330_202_3_1                        | 17.11 | 11-103                        | Cmpl: LSU.U1109          | Nd                                            |
| 1515496_120_4_-1                     | 17.01 | 32-90                         | Cmpl: LSU.U2861          | snR46-E                                       |
| 810933_96_7_-1                       | 16.48 | 9-89                          | Cmpl: LSU.U985           | snR8b-E                                       |
| 777355_157_13_-1                     | 16.03 | 62-137                        | Cmpl: LSU.U965           | snR43-P                                       |
| 76850_126_12_1                       | 15.94 | 39-103                        | Cmpl: SSU.U466           | snR189a-P                                     |
| <b>1517880_200_4_1</b>               | 15.66 | 1-103                         | Cmpl: LSU.U2132          | snR3b-P                                       |
| <b>45140_291_2_1</b>                 | 15.48 | 62-146                        | Cmpl: SSU.U1189          | snR35-P                                       |
| 426518_246_15_-1                     | 15.41 | 42-117                        | Cmpl: LSU.U2313          | Nd                                            |
| 169854_127_4_-1                      | 15.34 | 39-117                        | Cmpl: SSU.U1185          | snR36-E                                       |
| 427179_360_15_-1                     | 15.24 | 250-340                       | Cmpl: LSU.U1055          | snR44b-P                                      |
| 164690_197_11_1                      | 14.93 | 36-120                        | Cmpl: LSU.U2350          | Nd                                            |
| 565854_280_5_1                       | 14.80 | 171-252                       | Cmpl: SSU.U759           | Nd                                            |

*continued on next page*

| <i>continued from previous page</i>  |       |                               |                          |                                               |
|--------------------------------------|-------|-------------------------------|--------------------------|-----------------------------------------------|
| element id                           | score | start-end of predicted snoRNA | target modification site | additional snoRNA which targets the same site |
| <b>455692_200_10_-1</b>              | 14.29 | 60-186                        | Cmpl: LSU.U2263          | snR3a-E                                       |
| 169854_127_4_-1                      | 14.27 | 41-117                        | Cmpl: LSU.U2415          | snR11a-E                                      |
| <b>H/ACA snoRNAs, 2 stem scanner</b> |       |                               |                          |                                               |
| 29726_260_0_1                        | 32.39 | 21-247                        | Cmpl: SSU.U120           | Nd                                            |
| 33146_467_0_-1                       | 29.53 | 227-453                       | Cmpl: LSU.U1051          | Nd                                            |
| 29726_260_0_1                        | 28.88 | 16-170                        | Cmpl: SSU.U211           | Nd                                            |
| <b>455692_200_10_-1</b>              | 27.89 | 3-175                         | Cmpl: SSU.U766           | Nd                                            |
| 101133_361_13_-1                     | 27.29 | 149-329                       | Cmpl: LSU.U2190          | snR32-E                                       |
| <b>14909_343_4_-1</b>                | 26.26 | 70-235                        | Cmpl: SSU.U106           | snR44a-P                                      |
| <b>1517880_200_4_1</b>               | 26.24 | 1-186                         | Cmpl: LSU.U2132          | snR3b-P                                       |
| 88007_192_2_-1                       | 23.40 | 12-176                        | Cmpl: LSU.U2861          | snR46-E                                       |
| 929022_299_16_1                      | 23.35 | 65-296                        | Cmpl: LSU.U1041          | snR33-E                                       |
| 156266_161_16_-1                     | 23.16 | 1-136                         | Cmpl: LSU.U959           | snR8a-E                                       |
| 268349_431_6_1                       | 23.09 | 101-363                       | Cmpl: LSU.U1055          | snR44b-P                                      |
| <b>45140_291_2_1</b>                 | 22.88 | 52-281                        | Cmpl: LSU.U2940          | snR37-E                                       |
| <b>234368_239_4_-1</b>               | 21.77 | 3-236                         | Cmpl: SSU.U1000          | snR31-E                                       |
| 2096_297_0_-1                        | 21.46 | 74-256                        | Cmpl: LSU.U989           | snR49-P                                       |
| 450723_361_12_-1                     | 21.39 | 106-318                       | Cmpl: SSU.U759           | Nd                                            |
| <b>14909_343_4_-1</b>                | 21.35 | 31-295                        | Cmpl: LSU.U775           | Nd                                            |
| 450723_361_12_-1                     | 21.23 | 106-359                       | Cmpl: LSU.U2730          | snR189b-E                                     |
| <b>C/D-box snoRNAs</b>               |       |                               |                          |                                               |
| 65374_120_14_1                       | 22.89 | 9-106                         | Cmpl: ySc-25S-Gm865      | snR50                                         |
| 482519_122_13_-1                     | 17.11 | 122-45                        | Cmpl: ySc-25S-Um1307     | Nd                                            |
| 482519_122_13_-1                     | 16.26 | 122-45                        | Cmpl: ySc-25S-Um1307     | Nd                                            |
| 168768_121_3_-1                      | 15.06 | 43-119                        | Cmpl: ySc-25S-Um1886     | snR62                                         |
| 290651_158_3_1                       | 14.75 | 158-62                        | Cmpl: ySc-25S-Um2918     | snR52                                         |
| 290651_158_3_1                       | 14.71 | 158-62                        | Cmpl: ySc-25S-Am782      | Nd                                            |
| 482519_122_13_-1                     | 14.44 | 122-45                        | Cmpl: ySc-25S-Um1307     | Nd                                            |
